1 **The S1/S2 boundary of SARS-CoV-2 spike protein modulates cell**  
2 **entry pathways and transmission**

3

4 Yunkai Zhu<sup>1,4</sup>, Fei Feng<sup>1,4</sup>, Gaowei Hu<sup>1,4</sup>, Yuyan Wang<sup>1,4</sup>, Yin Yu<sup>1</sup>, Yuanfei Zhu<sup>1</sup>, Wei Xu<sup>1</sup>,  
5 Xia Cai<sup>1</sup>, Zhiping Sun<sup>1</sup>, Wendong Han<sup>1</sup>, Rong Ye<sup>1</sup>, Hongjun Chen<sup>3</sup>, Qiang Ding<sup>2</sup>, Qiliang  
6 Cai<sup>1</sup>, Di Qu<sup>1</sup>, Youhua Xie<sup>1\*</sup>, Zhenghong Yuan<sup>1\*</sup>, and Rong Zhang<sup>1\*</sup>

7

8 <sup>1</sup>Key Laboratory of Medical Molecular Virology (MOE/NHC/CAMS), School of Basic  
9 Medical Sciences, Shanghai Medical College, Biosafety Level 3 Laboratory, Fudan  
10 University, Shanghai 200032, China;

11 <sup>2</sup>Center for Infectious Disease Research, School of Medicine, Tsinghua University,  
12 Beijing 100086, China;

13 <sup>3</sup>Shanghai Veterinary Research Institute, CAAS, Shanghai, 200241, China.

14 <sup>4</sup>These authors contributed equally to this work.

15

16 \*Corresponding authors: Youhua Xie, Ph.D., [yhxie@fudan.edu.cn](mailto:yhxie@fudan.edu.cn); Zhenghong Yuan,  
17 Ph.D., [zhyuan@shmu.edu.cn](mailto:zhyuan@shmu.edu.cn); Rong Zhang, Ph.D., [rong\\_zhang@fudan.edu.cn](mailto:rong_zhang@fudan.edu.cn)

18 Lead Contact : Rong Zhang, Ph.D.

19

20 Figures: 5; Supplemental Figures: 7; Supplementary Tables: 2

21

22 Running title: SARS-CoV-2 spike S1/S2 boundary modulates entry pathways and  
23 transmission

24

25

## 26 **SUMMARY**

27 **The global spread of SARS-CoV-2 is posing major public health challenges.**  
28 **One unique feature of SARS-CoV-2 spike protein is the insertion of multi-basic**  
29 **residues at the S1/S2 subunit cleavage site, the function of which remains**  
30 **uncertain. We found that the virus with intact spike (Sfull) preferentially enters**  
31 **cells via fusion at the plasma membrane, whereas a clone (Sdel) with deletion**  
32 **disrupting the multi-basic S1/S2 site instead utilizes a less efficient endosomal**  
33 **entry pathway. This idea was supported by the identification of a suite of**  
34 **endosomal entry factors specific to Sdel virus by a genome-wide CRISPR-Cas9**  
35 **screen. A panel of host factors regulating the surface expression of ACE2 was**  
36 **identified for both viruses. Using a hamster model, animal-to-animal transmission**  
37 **with the Sdel virus was almost completely abrogated, unlike with Sfull. These**  
38 **findings highlight the critical role of the S1/S2 boundary of the SARS-CoV-2 spike**  
39 **protein in modulating virus entry and transmission.**

40

41

## 42 **INTRODUCTION**

43 SARS-CoV-2 and SARS-CoV share nearly 80% nucleotide sequence identity  
44 and use the same cellular receptor, angiotensin-converting enzyme 2 (ACE2), to enter  
45 target cells(Hoffmann et al., 2020b; Zhou et al., 2020). However, the newly emerged  
46 SARS-CoV-2 exhibits greater transmissibility(Cespedes and Souza, 2020; Chen, 2020;  
47 Hui et al., 2020; Li et al., 2020). The viral structural protein, spike (S), plays critical roles  
48 in determining the entry events, host tropism, pathogenicity, and transmissibility. One  
49 significant difference between the SARS-CoV-2 spike protein and those of other bat-like  
50 SARS-CoV is the insertion of multi-basic residues (RRAR) at the junction of S1 and S2  
51 cleavage site(Wang et al., 2020b). Previous studies showed that expression of SARS-

52 CoV-2 spike in cells promotes cell-cell membrane fusion, which is reduced after deletion  
53 of the RRAR sequence or when expressing SARS-CoV S protein lacking these  
54 residues(Hoffmann et al., 2020a; Xia et al., 2020). Pseudovirus or live virus bearing  
55 SARS-CoV-2 spike deletion at the S1/S2 junction decreased the infection in Calu-3 cells  
56 and attenuated infection in hamsters(Hoffmann et al., 2020a; Lau et al., 2020). The  
57 sequence at the S1/S2 boundary seems to be unstable, as deletion variants are  
58 observed both in cell culture and in patient samples(Lau et al., 2020; Liu et al., 2020;  
59 Ogando et al., 2020; Wong et al.). SARS-CoV-2 entry is mediated by sequential  
60 cleavage at the S1/S2 junction site and additional downstream S2' site of spike protein.  
61 The sequence at the S1/S2 boundary contains a cleavage site for the furin protease,  
62 which could preactivate the S protein for membrane fusion and potentially reduce the  
63 dependence of SARS-CoV-2 on plasma membrane proteases, such as transmembrane  
64 serine protease 2 (TMPRSS2), to enable efficient cell entry(Shang et al., 2020). Here,  
65 we evaluate how the deletion at the S1/S2 junction impacts virus entry and cell tropism,  
66 define the host factors regulating this process, and determine whether the presence of  
67 these multi-basic residues contributes to the enhanced transmission of SARS-CoV-2.

68

69

## 70 **RESULTS**

### 71 **The deletion at the S1/S2 boundary of spike protein impacts the infectivity in cells**

72 We observed the same phenomena that others have reported, an instability of  
73 the SARS-CoV-2 S1/S2 boundary(Lau et al., 2020; Liu et al., 2020; Ogando et al.,  
74 2020). Using the patient-isolated SARS-CoV-2 SH01 strain, we performed three rounds  
75 of plaque purification in Vero E6 cells in the presence of trypsin and observed no  
76 mutations in any of the structural genes (Sfull virus). However, after two additional  
77 rounds of passage without trypsin, a 21- nucleotide deletion at the S1/S2 cleavage site

78 was acquired, disrupting the RRAR motif (**Figure 1A, Figure S1A**). We designated the  
79 plaque-purified deletion clone as Sdel virus and detected no additional mutations in the  
80 full-length genome when compared to the Sfull virus. Unexpectedly, this presumed cell  
81 culture adaptation could be prevented by adding trypsin to the media or by ectopically  
82 expressing the serine protease TMPRSS2 in Vero E6 cells (**Figure S1B and 1C**).  
83 Compared to Sfull, the deletion-bearing Sdel virus exhibited a dramatic increase in  
84 infectivity as measured by the greater percentage of nucleocapsid (N) antigen-positive  
85 cells (**Figure S2A**) and higher yield in virus production in wild-type Vero E6 (hereafter  
86 Vero cells), Vero plus trypsin, Vero expressing TMPRSS2, and A549 cells expressing  
87 the receptor ACE2 (**Figure 1B-D**). Conversely, in human Calu-3 lung epithelial cells, the  
88 Sdel virus replicated slower than the Sfull clone (**Figure 1B-D**), similar to previous  
89 reports using a pseudovirus or fully infectious, mutant virus (Hoffmann et al., 2020a; Lau  
90 et al., 2020). Moreover, we found that pseudovirus bearing the S protein from Sfull, Sdel,  
91 or a RRAR mutant variant (R682S, R685S)(Wang et al., 2020a), had a phenotype  
92 similar to infectious viruses used in these cell types (**Figure 1D and 1E**). Of note,  
93 infection using either the Sdel S- or mutant variant S (R682S, R685S)-bearing  
94 pseudovirus was decreased by approximately ten-fold in Calu-3 cells, highlighting the  
95 critical role of these basic residues at the S1/S2 boundary in infectivity.

#### 96 **S1/S2 boundary of spike protein modulates cell entry pathways**

97 Coronavirus enters cells through two pathways: fusion at the plasma membrane  
98 or in the endosome(Tang et al., 2020). To assess the impact of the S1/S2 junction  
99 deletion on viral entry, cells were treated with camostat mesilate, a TMPRSS2 inhibitor  
100 that blocks viral fusion at the plasma membrane, and/or E-64d (aloxistatin), an inhibitor  
101 that blocks the protease activity of cathepsins B and L, which are required for the  
102 endosomal membrane fusion (**Figure 1F, Figure S2B**). We observed apparent S1/S2  
103 cleavage for Sfull virus but not for Sdel in multiple cell types (**Figure S3A**). Sfull virus

104 infection, as measured by N antigen-positive cells, was sensitive to inhibition by E-64d  
105 but not camostat in Vero cells (**Figure 1F**). When TMPRSS2 was expressed, both  
106 camostat and E-64d inhibited the infectivity of Sfull, indicating that expression of  
107 TMPRSS2 could promote the membrane fusion entry pathway. Remarkably, E-64d and  
108 camostat had no effect on Sfull virus in A549-ACE2 cells, suggesting that in this cell Sfull  
109 may use other TMPRSS2 homologs or trypsin-like proteases to activate fusion at the  
110 plasma membrane since TMPRSS2 expression is absent in A549 cells(Matsuyama et  
111 al., 2020). We observed a similar phenotype even when cells were treated with a high  
112 concentration of inhibitors (**Figure S2C**). In Calu-3 cells, camostat completely blocked  
113 the Sfull infection, but E-64d had minimal effects, suggesting that Sfull preferentially  
114 enters Calu-3 cells via the plasma membrane fusion pathway.

115 For the Sdel virus, E-64d significantly inhibited infection in Vero, Vero-TMPRSS2,  
116 and A549-ACE2 cells, whereas camostat did not reduce the infection, even in Vero-  
117 TMPRSS2 cells (**Figure 1F**). It is noteworthy that Sdel was sensitive to both inhibitors in  
118 Calu-3 cells unlike the Sfull virus, and these two compounds exerted a synergetic effect  
119 on Sdel infection. This suggests Sdel utilizes both plasma membrane and endosomal  
120 fusion pathways in Calu-3 cells. The spike protein of SARS-CoV does not have the  
121 insertion of multiple basic residues at the S1/S2 cleavage site and thus resembles the  
122 Sdel virus (**Figure 1A**). Indeed, E-64, but not camostat, efficiently inhibited SARS-CoV  
123 pseudovirus infection in multiple cell types (**Figure S2D**). These results demonstrate that  
124 the deletion at the S1/S2 junction site propels the virus to enter cells through the  
125 endosomal fusion pathway, which is less efficient than the fusion pathway at the plasma  
126 membrane in airway epithelial cells as indicated by the reduced infectivity in Calu-3 cells.  
127 Both Sdel and SARS-CoV may share a similar entry pathway.

128 **CRISPR/Cas9 screen identifies endosomal entry factors required for Sdel virus**  
129 **infection**

130 Genome-wide CRISPR/Cas9 screens have enabled the identification of host  
131 factors required for efficient virus infection(Karakus et al., 2019; Marceau et al., 2016;  
132 Richardson et al., 2018; Zhang et al., 2018; Zhang et al., 2016). A lack of suitable  
133 human physiologically relevant cell lines and the S protein-induced syncytia formation in  
134 cells have made such a screen for SARS-CoV-2 very challenging. We found that Sdel  
135 virus preferentially enters A549-ACE2 cells via the endosomal fusion pathway, replicates  
136 robustly, does not cause syncytia, and efficiently results in cell death. Because of these  
137 properties, we performed a genome-wide, cell survival-based screen with the Sdel virus  
138 in A549-ACE2 cells transduced with a library of single-guide RNAs (sgRNAs) targeting  
139 19,114 human genes (**Figure 2A**)(Doench et al., 2016). The vast majority of transduced  
140 cells inoculated with Sdel virus died within seven days of infection. Surviving cells were  
141 harvested and expanded for a second round of challenge with Sdel. The remaining  
142 surviving cells were expanded and subjected to genomic DNA extraction, sgRNA  
143 sequencing, and data analysis (**Supplementary Tables 1 and 2**).

144 The top candidates from the CRISPR screen were determined according to their  
145 MAGeCK score (**Figure 2B**). The top hit was ACE2, the cellular receptor that confers  
146 susceptibility to SARS-CoV-2, which confirmed the validity of the screen. Additionally,  
147 the gene encoding cathepsin L (CTSL), a target of our earlier assay using E-64d that is  
148 known to be important for activating SARS-CoV virion membrane fusion with the  
149 endosome (Simmons et al., 2005), also was identified, again confirming the utility of the  
150 screening strategy.

151 We chose the top 36 genes with a cutoff of false discovery rate (FDR) < 0.15. For  
152 each specific gene target, A549-ACE2 cells were transduced with two independent  
153 sgRNAs and then infected with Sdel. The percentage of N protein-positive cells was  
154 determined by image-based analysis. Remarkably, editing of all 32 genes resulted in a  
155 statistically significant reduction in Sdel infection compared to cells receiving the control

156 sgRNA (**Figure 2C**). Most of these genes were associated with the endolysosome,  
157 including components of the retromer complex, the COMMD/CCDC22/CCDC93 (CCC)  
158 complex, Wiskott-Aldrich syndrome protein and SCAR homologue (WASH) complex,  
159 and actin-related protein 2/3 (Arp2/3) complex, which have significant roles in  
160 endosomal cargo sorting(Liu et al., 2016; McNally and Cullen, 2018). We also identified  
161 genes encoding the WD Repeat Domain 81 (WDR81)-WDR91 complex, which was  
162 detected in a previous a genetic screen for regulators of endocytosis and the fusion of  
163 endolysosomal compartments(Rapiteanu et al., 2016). Similarly, we identified the gene  
164 encoding Transcription Factor Binding To IGHM Enhancer 3 (TFE3), which may regulate  
165 lysosomal positioning in response to starvation or cholesterol-induced lysosomal  
166 stress(Willett et al., 2017). We also validated NPC Intracellular Cholesterol Transporter 1  
167 (NPC1) and NPC2, which regulate intracellular cholesterol trafficking, as important for  
168 Sdel infection(Cologna and Rosenhouse-Dantsker, 2019; Pfeffer, 2019). In addition, the  
169 gene for Activating Signal Cointegrator complex 3 (ASCC3), which functions as a  
170 negative regulator of the host defense response, was identified in our screen(Li et al.,  
171 2013). From these hits, we selected representative genes to validate for cell-type  
172 specificity in HeLa-ACE2 cells, finding that all the genes tested greatly reduced infection  
173 with Sdel virus (**Figure S4A**).

174 To define the stage of viral infection that each of the 32 validated genes acted,  
175 one representative sgRNA per gene was selected for study in A549-ACE2 cells. Due to  
176 its known antiviral activity, ASCC3 was not targeted. We confirmed that editing of these  
177 genes did not affect cell viability (**Figure S4B**). The gene-edited cells were infected with  
178 pseudovirus bearing the Sdel virus S protein or, as a control, the glycoprotein of  
179 vesicular stomatitis virus (VSV-G) (**Figure 3A and 3B**). Consistent with data from the  
180 fully infectious Sdel virus, editing any of the selected genes markedly inhibited Sdel  
181 pseudovirus infection whereas only editing of some retromer-associated genes and the

182 Arp2/3 complex significantly reduced the VSV-G pseudovirus infection. These results  
183 suggest that these genes mediate Sdel virus entry. Notably, pseudovirus bearing the  
184 spike protein of SARS-CoV, which lacks the multiple basic residues at the S1/S2  
185 junction as Sdel, exhibited a phenotype similar to Sdel pseudovirus and Sdel live virus  
186 (**Figure 3C and 2C**). Editing of these genes, including those encoding CTSL, cholesterol  
187 transporters NPC1/2, WDR81/91, and TFE3, markedly reduced infection, suggesting  
188 that Sdel and SARS-CoV may utilize similar entry machinery (**Figure 3C**). Intriguingly,  
189 these genes edited also significantly inhibited the infection by pseudovirus bearing the  
190 spike protein of MERS-CoV in A549-ACE2-DPP4 cells (**Figure 3D**). Although the furin  
191 cleavage site is present at the S1/S2 boundary of MERS-CoV{Millet, 2014 #374}, it  
192 preferentially enters the A549 cell via endosomal pathway as indicated by its sensitivity  
193 to E-64d inhibitor (**Figure S2E**). This is possibly due to the lack of proper protease to  
194 activate the plasma membrane fusion pathway in A549 cells for MERS-CoV as  
195 compared to the Sfull virus.

#### 196 **Sdel endosomal entry factors are not required for Sfull virus infection**

197 To determine whether these genes identified impact Sfull virus infection, one  
198 representative sgRNA per gene was tested (**Figure 3E**). The editing efficiency of some  
199 these genes by sgRNAs was confirmed by western blotting (**Figure S3B**). As expected,  
200 editing of *CTSL* did not reduce infection, as the Sfull virus enters A549-ACE2 cells via an  
201 endosomal-independent pathway (demonstrated in **Figure 1F**). In general, editing of  
202 genes encoding complexes that regulate the retrieval and recycling of cargo significantly  
203 reduced infection, albeit to a lesser extent than observed with the Sdel live virus.  
204 However, unlike our results with the Sdel virus, editing of *NPC1* or *NPC2* had a  
205 negligible impact on Sfull virus infection, raising question of the effectiveness of  
206 perturbing cholesterol trafficking with inhibitors such as U18666A in COVID-19 as  
207 previously proposed(Ballout et al., 2020; Sturley et al., 2020).



208 U18666A, a cationic sterol, binds to the NPC1 protein to inhibit cholesterol export  
209 from the lysosome, resulting in impaired endosome trafficking, late endosome/lysosome  
210 membrane fusion(Cenedella, 2009; Ko et al., 2001; Lu et al., 2015). U1866A has been  
211 shown to inhibit the S protein-driven entry of SARS-CoV, Middle East Respiratory  
212 Syndrome coronavirus (MERS-CoV), and the human coronaviruses NL63 and 229E,  
213 with the most efficient inhibition observed with SARS-CoV(Wrensch et al., 2014). The  
214 antiviral effect of U18666A on type I feline coronavirus (FCoV) has also been  
215 characterized *in vitro* and *in vivo*(Doki et al., 2020; Takano et al., 2017). We found that,  
216 pretreating A549-ACE2 cells 2 h prior to or post infection had no inhibitory effect on Sfull  
217 virus (**Figure 3F**). In contrast, Sdel virus was more sensitive to U18666A, even when  
218 used for treatment 2 h post infection, presumably due to Sdel preferential usage of the  
219 endosomal entry pathway. Together with results showing no impact on Sfull virus  
220 infection after editing of genes *WDR81/91* and *TFE3* functioning in endolysosomes  
221 (**Figure 3E**), these studies suggest that, because of the different entry pathways used by  
222 the virus depending on the deletion at the S1/S2 boundary, the Sdel CRISPR hits in the  
223 endosomal pathway are dispensable for Sfull virus infectivity, and targeting the  
224 endosomal entry pathway with inhibitors might be not efficient to block the virus infection.

### 225 **Genes regulating the ACE2 surface expression are required for infection by both** 226 **Sdel and Sfull viruses**

227 The Sdel-validated genes that also affected Sfull infectivity were largely multi-  
228 protein complexes (**Figure 2C and 3C**). These complexes are important for maintaining  
229 plasma membrane and lysosomal homeostasis by maintaining expression of key integral  
230 proteins, including signaling receptors and transporters(McMillan et al., 2017; McNally  
231 and Cullen, 2018). We hypothesized that disruption of these complexes might affect the  
232 binding or transit of virions. To this end, we performed binding and internalization assays  
233 using Sfull virus in A549-ACE2 cells. The genes *COMMD3*, *VPS29*, and *CCDC53*, which

234 encode proteins that are comprise CCC, retromer, and WASH complexes, respectively,  
235 were each edited; effects on expression were confirmed by western blotting (**Figure**  
236 **S3B**). Notably, binding and internalization of Sfull virions to these cells was significantly  
237 decreased compared to control sgRNA (**Figure 4A**).

238         The entry receptor ACE2 is critical for SARS-CoV-2 infection. To determine  
239 whether cell surface expression of ACE2 is regulated by these complexes, gene-edited  
240 cells (*COMMD3*, *VPS29*, *VPS35*, *CCDC53*, *CCDC22*, and *NPC1*) were incubated with  
241 S1-Fc recombinant protein or an anti-ACE2 antibody, and binding was measured by flow  
242 cytometry (**Figure 4B and 4C**). Editing of these genes perturbed the surface expression  
243 of ACE2, with the exception of the cholesterol transporter gene *NPC1*. To confirm these  
244 findings, we biotinylated the surface proteins of these gene-edited cells,  
245 immunoprecipitated with streptavidin, and performed western blotting and quantification  
246 (**Figure 4D and 4E**). A significant reduction of surface ACE2 was observed across the  
247 different cell lines except for *NPC1*-edited cells. To correlate the significance of this  
248 finding for virus infection, we edited *CCDC53*, which showed the greatest reduction in  
249 virion internalization, in Calu-3 lung cells. Viral yield was approximately ten-fold lower in  
250 the *CCDC53*-edited compared to control cells at 24 h for Sfull and 48 h for Sdel (**Figure**  
251 **4F and 4G**). These results suggest retrieval and recycling complexes identified in our  
252 screen regulate expression of the ACE2 receptor, which is required for optimal SARS-  
253 CoV-2 infection.

#### 254 **SARS-CoV-2 entry is elegantly regulated by endosomal cargo sorting complexes**

255         To distinguish the complexes important for virus infection, we edited additional  
256 genes. The retriever complex is another retromer-like complex that mediates cargo  
257 recycling and consists of the genes *DSCR3*, *C16orf62*, and *VPS29*(McNally et al., 2017).  
258 *VPS29* and *C16orf16* that were identified in our screen, also are shared functionally by  
259 the retromer and CCC complexes(Norwood et al., 2011; Phillips-Krawczak et al., 2015).

260 Sorting Nexin 17 (SNX17) acts as a cargo adaptor-associated with retriever and the  
261 adaptor SNX31(McNally et al., 2017). SNX27 and SNX3 are two additional cargo  
262 adaptors associated with the retromer complex(Burd and Cullen, 2014). To test these  
263 genes, which were not identified in our screen, we introduced three sgRNAs per gene in  
264 A549-ACE2 cells and infected with Sdel virus. The editing efficiency of SNX17 and  
265 SNX27 was confirmed by western blotting (**Figure S5**). Only the retromer-associated  
266 adaptor SNX27 was required (**Figure S5**), highlighting the importance of the retromer  
267 complex over the retriever one for Sdel infection.

268 The COMMD proteins of CCC complex are a 10-member family (COMMD1-  
269 10)(Burstein et al., 2005) that act as cargo-binding adaptors(Bartuzi et al., 2016; Li et al.,  
270 2015). Of these 10 proteins, we identified the genes encoding all of them in our screen  
271 except for COMMD1, 6, and 9 (**Figure 2C**). Knockout of the COMMD1, 6, and 9  
272 increases the low-density lipoprotein cholesterol levels in the plasma membrane, thereby  
273 maintaining lipid raft composition(Fedoseienko et al., 2018). In our experiments, editing  
274 each of these three genes as well as cholesterol uptake-related genes did not impact  
275 Sdel infection in A549-ACE2 or HeLa-ACE2 cells (**Figure S6A and 7B**), suggesting that  
276 these members of the COMMD protein family function differently. Notably, knockout of  
277 *COMMD1* did not affect expression of *COMMD3* or *CCDC22* in our study as opposed to  
278 previous work (**Figure S6C**)(Bartuzi et al., 2016; Fedoseienko et al., 2018). Overall, our  
279 experiments demonstrate that SARS-CoV-2 entry is regulated by endosomal cargo  
280 sorting complexes. Understanding how these complexes regulate the sorting of incoming  
281 virions might enable development of host-directed antiviral agents to control COVID-19.

## 282 **The S1/S2 boundary of spike protein impacts infection and disease in hamsters**

283 In cell culture, we demonstrated that the Sdel virus resulted in a switch from the  
284 plasma membrane to endosomal fusion pathway for entry. In Calu-3 lung cells, which  
285 model more physiologically relevant airway epithelial cells, this switch led to a less

286 efficient endosomal entry process. Since virus entry is the first step in establishing  
287 infection, we hypothesized that deletion at the S1/S2 boundary might reduce virus  
288 infectivity and transmissibility *in vivo*. Indeed, using the golden Syrian hamster model, a  
289 previous study showed that a SARS-CoV-2 variant with a 30-nucleotide deletion at the  
290 S1/S2 junction caused milder disease and less viral infection in the trachea and lungs  
291 compared to a virus lacking the deletion(Lau et al., 2020).

292 We evaluated the tissue tropism of the Sfull and Sdel virus following intranasal  
293 inoculation of golden Syrian hamsters. Nasal turbinates, trachea, lungs, heart, kidney,  
294 spleen, duodenum, brain, serum, and feces were collected. Sfull virus replicated robustly  
295 and reached peak titer at day 1 post infection, with a mean titer 31-, 126-, and 1259-fold  
296 higher than Sdel in the turbinates, trachea, and lungs, respectively (**Figure 5A**). While  
297 Sdel virus replication was delayed, no significant differences were observed by day 4 in  
298 these three tissues (**Figure 5B**). At days 2 and 4, five pieces of fresh feces were  
299 collected from each hamster. Although no infectious virus was detected by focus-forming  
300 assay (data not shown), viral RNA levels were higher in fecal samples for Sfull (20 and  
301 40-fold) than Sdel at days 2 and 4, respectively (**Figure 5B**). Likely related to this, no  
302 infectious virus was detected in the duodenum, and Sfull RNA was 6.3-fold higher than  
303 Sdel at day 4 (**Figure S7A**). In serum, we detected no difference in viremia at day 1, but  
304 Sfull RNA was 63- and 32-fold higher than Sdel at days 2 and 4, respectively (**Figure**  
305 **S7B**). In other extrapulmonary organs, infectious virus was not consistently detected  
306 (data not shown). In general, brain tissue had the highest viral RNA copy number, and  
307 all organs showed higher levels of Sfull RNA at day 2 or 4 compared to Sdel except for  
308 the liver and kidneys (**Figure S7C-G**). Weight loss was only observed in hamsters  
309 inoculated with Sfull and decreased as much as ~18% at days 5 and 6 (**Figure S7H**).

310 **The S1/S2 boundary of spike protein modulates the transmission**

311 To determine the impact of deletion at the S1/S2 junction on transmissibility by  
312 direct contact exposure, six hamsters were inoculated intranasally with Sfull or Sdel  
313 virus. At 24 h post inoculation, each donor hamster was transferred to a new cage and  
314 co-housed with one naïve hamster for 3 days. For donors (day 4 post-inoculation), tissue  
315 samples were processed (**Figure 5A and 5B, and Figure S7**). For contact hamsters  
316 (day 3 post-exposure), nasal turbinate, trachea, and lungs were collected for infectious  
317 virus titration and histopathological examination. The peak titers in turbinate, trachea,  
318 and lungs from Sfull-exposed hamsters reached 8, 6.6, and 7.4 logs, respectively (6.6  
319 logs, 6.2 logs, and 6.1 logs on average, respectively) (**Figure 5C**). Unexpectedly, no  
320 infectious virus was detected in these three tissues from Sdel-exposed hamsters (**Figure**  
321 **5C**). In lung sections from hamsters that were exposed to Sfull-infected animals, we  
322 observed mononuclear cell infiltrate, protein-rich fluid exudate, hyaline membrane  
323 formation, and haemorrhage (**Figure 5D**). In contrast, no or minimal histopathological  
324 change was observed in the lung sections from hamsters that were exposed to Sdel-  
325 infected animals (**Figure 5D**). To examine viral spread in the lungs, we performed RNA  
326 *in situ* hybridization (ISH). Viral RNA was clearly detected in bronchiolar epithelial cells in  
327 hamsters exposed to Sfull-infected animals (**Figure 5E**) whereas it was rarely detected  
328 in hamsters exposed to Sdel-infected animals. Similarly, abundant RNA was observed in  
329 the nasal turbinate epithelium (**Figure 5F**). These results indicated that transmission of  
330 Sfull from infected hamsters to co-housed naïve hamsters was efficient whereas the  
331 deletion at the S1/S2 boundary in the S protein of Sdel markedly reduced transmission.

332

333

## 334 **DISCUSSION**

335 Using authentic infectious viruses, our *in vitro* and *in vivo* studies establish that  
336 the unique S1/S2 boundary of the SARS-CoV-2 S protein can determine the entry

337 pathways and transmission of the virus (**Figure 5G**). The Sfull virus with an intact  
338 boundary bearing the multi-basic residues, RRAR, preferentially enters cells through the  
339 plasma membrane fusion pathway, whereas Sdel with the deletion disrupting these  
340 residues switches the cell entry to a less efficient endosomal pathway. This is further  
341 demonstrated when we mutated two basic residues in the RRAR motif (R682S, R685S),  
342 which led to less efficient infection of Sdel in Calu-3 cells. In Vero cells expressing no or  
343 minimal TMPRSS2, Sfull virus enters via endosomal pathway, making the multi-basic  
344 dispensable, which results in its deletion, presumably due to an adaptive advantage.  
345 This deletion effect could be abrogated by adding trypsin or by expressing TMPRSS2,  
346 which allows the virus to resume entry via the plasma membrane fusion pathway, as we  
347 verified by the acquisition of sensitivity to camostat. In contrast, the Sdel virus maintains  
348 its usage of the E-64d-sensitive endosomal pathway for entry even in Vero-TMPRSS2  
349 cells. The results of our experiments using the SARS-CoV spike protein, which lacks the  
350 multiple basic residues at the S1/S2 junction, were similar to what we observed for the  
351 Sdel virus. It is noteworthy that infection by Sdel virus, but not Sfull, in A549-ACE2 cells  
352 is sensitive to the cathepsins B/L inhibitor E-64d, highlighting the importance of S1/S2  
353 boundary sequence in this entry process. Treatment with camostat has no impact on  
354 Sfull virus infection in A549-ACE2 cells, as no or minimal TMPRSS2 is expressed,  
355 suggesting that other TMPRSS2 homologs or trypsin-like proteases may activate the  
356 Sfull virus entry at the plasma membrane.

357       The notion that this deletion at the S1/S2 boundary discriminates the entry  
358 pathway used by the virus was supported by the large number of endosomal entry host  
359 factors uncovered in our genome-wide CRISPR screen. Genes for the endosomal entry-  
360 specific enzyme CTSL and for regulating endolysosomal trafficking and membrane fusion,  
361 such as *NPC1/2* and *WDR81/91*, were required for Sdel, but not for Sfull virus infection.  
362 In parallel, we discovered a panel of entry factors common to both Sdel and Sfull that

363 regulate the surface expression of the SARS-CoV-2 receptor ACE2. Understanding the  
364 detailed mechanisms of action for these common host factors could help in the  
365 development of potential countermeasures to combat COVID-19. More importantly,  
366 because Sfull virus preferentially enters cells at the plasma membrane, targeting the  
367 endosomal entry pathway might not be a promising strategy to inhibit SARS-CoV-2  
368 infection. This is exemplified by the *in vitro* and *in vivo* results of studies examining the  
369 lysosomal acidification inhibitors chloroquine and hydroxychloroquine(Boulware et al.,  
370 2020; Hoffmann et al., 2020c; Kupferschmidt).

371 The serine protease TMPRSS2 on the cell surface activates the spike protein-  
372 mediated membrane fusion pathway, which is important for virus spread(Iwata-  
373 Yoshikawa et al., 2019; Zhou et al., 2015). It has been reported that TMPRSS2 is  
374 enriched in nasal and bronchial tissues(Qi et al., 2020; Sungnak et al., 2020a; Sungnak  
375 et al., 2020b), implying that the transmission of SARS-CoV-2 by respiratory droplets  
376 might be enhanced for virus bearing an intact versus a deleted S1/S2 boundary. In our  
377 hamster experiments, the deletion mutant virus Sdel exhibited decreased viral infection  
378 and disease compared to Sfull. More importantly, the transmission of Sdel by direct  
379 contact exposure for 3 days was almost completely abrogated. The nearly complete  
380 abrogation of infection by direct contact highlights the critical role of the multi-basic  
381 sequence at the S1/S2 boundary in transmissibility, presumably due to usage of the  
382 more efficient fusion entry pathway.

383

384

## 385 **METHODS**

386 **Cells.** Vero E6 (Cell Bank of the Chinese Academy of Sciences, Shanghai,  
387 China), HEK 293T (ATCC # CRL-3216), HeLa (ATCC #CCL-2), A549 (kindly provided  
388 by M.S. Diamond, Washington University), and Calu-3 (Cell Bank of the Chinese

389 Academy of Sciences, Shanghai, China) all were cultured at 37°C in Dulbecco's  
390 Modified Eagle Medium (Hyclone #SH30243.01) supplemented with 10% fetal bovine  
391 serum (FBS), 10 mM HEPES, 1 mM Sodium pyruvate, 1× non-essential amino acids,  
392 and 100 U/ml of Penicillin-Streptomycin. The A549-ACE2 and HeLa-ACE2 clonal cell  
393 lines were generated by transduction of lentivector expressing the human ACE2 gene as  
394 described bellow. Similarly, the bulk Vero-TMPRSS2 cells were generated by  
395 transduction of lentivector expressing the human TMPRSS2 and selected with  
396 puromycin. The surface expression of ACE2 or TMPRSS2 was confirmed by flow  
397 cytometry. All cell lines were tested routinely and free of mycoplasma contamination.

398 **Viruses.** The SARS-CoV-2 nCoV-SH01 strain (GenBank accession no.  
399 MT121215) was isolated from a COVID-19 patient by passaging in Vero E6 cells twice in  
400 the presence of trypsin. This virus stock underwent three rounds of plaque-purification in  
401 Vero E6 cells in the presence of trypsin and designated as SH01-Sfull (thereafter as  
402 Sfull). Sfull stain was then passaged twice and plaque-purified once in the absence of  
403 trypsin, resulting the stain Sdel that has 21 nt deletion in the spike gene. Sfull virus was  
404 also passaged twice in Vero E6 cells in the presence of trypsin or twice in Vero E6  
405 ectopically expressing the TMPRSS2 without trypsin. The virus titers were titrated in  
406 Vero E6 cells in the presence of trypsin by focus-forming assay as described below. The  
407 full-genome of Sfull and Sdel strains, and the entire spike gene of other passaged viral  
408 stocks were Sanger sequenced and analyzed. All the sequencing primers are available  
409 upon request. All experiments involving virus infections were performed in the biosafety  
410 level 3 (BSL-3) facility of Fudan University following the regulations.

411 **Genome-wide CRISPR sgRNA screen.** A human Brunello CRISPR knockout  
412 pooled library encompassing 76,441 different sgRNAs targeting 19,114 genes(Doench  
413 et al., 2016) was a gift from David Root and John Doench (Addgene #73178), and  
414 amplified in Endura cells (Lucigen #60242) as described previously(Joung et al., 2017;



415 Sanjana et al., 2014). The sgRNA plasmid library was packaged in 293FT cells after co-  
416 transfection with psPAX2 (Addgene #12260) and pMD2.G (Addgene #12259) at a ratio  
417 of 2:2:1 using Fugene®HD (Promega). At 48 h post transfection, supernatants were  
418 harvested, clarified by spinning at 3,000 rpm for 15 min, and aliquotted for storage at -  
419 80°C.

420 For the CRISPR sgRNA screen, A549-ACE2-Cas9 cells were generated by  
421 transduction of A549-ACE2 cell line with a packaged lentivirus expressing the mCherry  
422 derived from the lentiCas9-Blast (Addgene #52962) that the blasticidin resistance gene  
423 was replaced by mCherry. The sorted mCherry positive A549-ACE2-Cas9 cells were  
424 transduced with packaged sgRNA lentivirus library at a multiplicity of infection (MOI) of  
425 ~0.3 by spinoculation at 1000g and 32°C for 30 min in 12-well plates. After selection with  
426 puromycin for around 7 days,  $\sim 1 \times 10^8$  cells in T175 flasks were inoculated with SARS-  
427 CoV-2 Sdel strain (MOI of 3) and then incubated until nearly all cells were killed. The  
428 medium was changed and remaining live cells grew to form colonies. The cells were  
429 then harvested and re-plated to the flasks. After second round of killing by the virus, the  
430 remaining cells were expanded and  $\sim 3 \times 10^7$  of cells were collected for genomic DNA  
431 extraction. Genomic DNA from the uninfected cells ( $5 \times 10^7$ ) was extracted as the  
432 control. The sgRNA sequences were amplified (Shalem et al., 2014) and subjected to  
433 next generation sequencing using an Illumina NovaSeq 6000 platform. The sgRNA  
434 sequences targeting specific genes were extracted using the FASTX-Toolkit  
435 ([http://hannonlab.cshl.edu/fastx\\_toolkit/](http://hannonlab.cshl.edu/fastx_toolkit/)) and cutadapt 1.8.1, and further analyzed for  
436 sgRNA abundance and gene ranking by a published computational tool (MAGeCK) (Li et  
437 al., 2014) (see Supplementary Tables 1 and 2).

438 **Gene validation.** Top 35 genes from the MAGeCK analysis were selected for  
439 validation. Two independent sgRNAs per gene were chosen from the Brunello CRISPR  
440 knockout library and cloned into the plasmid lentiCRISPR v2 (Addgene #52961) and

441 packaged with plasmids psPAX2 and pMD2.G. A549-ACE2, HeLa-ACE2, or Calu-3 cells  
442 were transduced with lentiviruses expressing individual sgRNA and selected with  
443 puromycin for 7 days. The gene-edited mixed population of cells was used for all the  
444 experiments in this study.

445 For virus infection, gene-edited A549-ACE2 or HeLa-ACE2 cells were inoculated  
446 with Sfull (MOI 2) and Sdel (MOI 2). Vero, Vero-TMPRSS2, and Calu-3 cells were  
447 inoculated with Sfull (MOI 1) and Sdel (MOI 1). At 24 h post infection, cells were fixed  
448 with 4% paraformaldehyde (PFA) diluted in PBS for 30 min at room temperature, and  
449 permeabilized with 0.2% Triton x-100 in PBS for 1 h at room temperature. Cells then  
450 were subjected for immunofluorescence staining and imaging as described bellow.  
451 Validation also was performed by an infectious virus yield assay.

452 **Virus yield assay.** Vero, Vero-TMPRSS2, A549-ACE2, and Calu-3 cells were  
453 seeded one day prior to infection. Cells were inoculated with same MOI of Sfull or Sdel  
454 (Vero, Vero-TMPRSS2, MOI 0.01; A549-ACE2, MOI 2; Calu-3, MOI 0.1) for 1 h. After  
455 three times of washing, cells were maintained in 2% FBS culture media, and  
456 supernatants were collected at specific time points for titration on Vero cells by focus-  
457 forming assay.

458 **Pseudotyped virus experiment.** Pseudoviruses were packaged in HEK 293T  
459 cells by co-transfecting the retrovector pMIG (kindly provided by Jianhua Li, Fudan  
460 University) for which the gene of target was replaced by the nanoluciferase gene,  
461 plasmid expressing the MLV Gag-Pol, and pcDNA3.1 expressing different spike genes  
462 or VSV-G (pMD2.G (Addgene #12259)) using Fugene®HD transfection reagent  
463 (Promega). At 48 h post transfection, the supernatant was harvested, clarified by  
464 spinning at 3500 rpm for 15 min, aliquoted and stored at -80C for use. The virus entry  
465 was assessed by transduction of pseudoviruses in gene-edited cells in 96-well plates.  
466 After 48 or 72 h, the luciferase activity was determined using Nano-Glo® Luciferase

467 Assay kit (Promega #N1110) according to the manufacturer's instructions. The same  
468 volume of assay reagent was added to each well and shake for 2 min, After incubation at  
469 room temperature for 10 min, luminescence was recorded by using a FlexStation 3  
470 (Molecular Devices) with an integration time of 1 second per well.

471 **Plasmid construction.** To construct the lentivector expressing the human ACE2  
472 gene, the human ACE2 gene (Miaolingbio #P5271) was PCR-amplified and cloned into  
473 the pLV-EF1a-IRES-blast (Addgene #85133). The human TMPRSS2 and DPP4 gene  
474 (Sino Biological #HG13070-CM) was cloned by the similar strategy. To construct the  
475 vectors for pseudovirus packaging, the full-length spike gene was PCR-amplified from  
476 Sfull or Sdel strain and cloned into the pcDNA3.1 vector. The Sfull spike gene with two  
477 mutations (R682S, R685S)(Wang et al., 2020a) in the furin cleavage site was generated  
478 by PCR. The full-length SARS-CoV or MERS-CoV spike gene was cloned similarly.

479 **Virus binding and internalization assays.** A549-ACE2 gene-edited cells were  
480 seeded in 24-well plate one day prior to the assays. Plates were pre-incubated on ice for  
481 10 min, then washed twice with ice-cold PBS. Ice-cold Sfull virus (MOI of 5) in a 0.5-ml  
482 medium was incubated with cells on ice for 45 min. After five cycles of washing, cells  
483 were lysed in TRIzol reagent (ThermoFisher #15596018) for RNA extraction. For  
484 internalization assay, after 5 cycles of washing, cells were incubated into medium  
485 supplemented with 2% FBS and then incubated at 37°C for 45 min. Cells were chilled on  
486 ice, washed with ice-cold PBS, and then treated with 400 µg/ml protease K on ice for 45  
487 min. After three additional washes, cells were lysed in TRIzol reagent for RNA extraction.  
488 RT-qPCR was conducted to quantify the viral specific nucleocapsid RNA and an internal  
489 control GAPDH.

490 **Cell-based S1-Fc and anti-ACE2 antibody binding assay.** A549-ACE2 gene-  
491 edited cells were seeded in 96-well plate one day prior to the experiment. Cells were  
492 collected with TrypLE (Thermo #12605010) and washed twice with ice-cold PBS. Live

493 cells were incubated with the recombinant protein, S1 domain of SARS-CoV-2 spike C-  
494 terminally fused with Fc (Sino Biological #40591-V02H, 1µg/ml), or the anti-ACE2  
495 antibody (Sino Biological #10108-RP01, 1 µg/ml) at 4 °C for 30 min. After washing, cells  
496 were stained with goat anti-human IgG (H + L) conjugated with Alexa Fluor 647 (Thermo  
497 #A21445, 2 µg/ml) for 30 min at 4 °C. After two additional washes, cells were subjected  
498 to flow cytometry analysis (Thermo, Attune™ NxT).

499 **Western blotting.** Cells in plates washed twice with ice-cold PBS and lysed in  
500 RIPA buffer (Cell Signaling #9806S) with a cocktail of protease inhibitors (Sigma-Aldrich  
501 # S8830). Samples were prepared in reducing buffer (50 mM Tris, pH 6.8, 10% glycerol,  
502 2% SDS, 0.02% [wt/vol] bromophenol blue, 100 mM DTT). After heating (95°C, 10 min),  
503 samples were electrophoresed in 10% SDS polyacrylamide gels, and proteins were  
504 transferred to PVDF membranes. Membranes were blocked with 5% non-fat dry  
505 powdered milk in TBST (100mM NaCl, 10mM Tris,pH7.6, 0.1% Tween 20) for 1 h at  
506 room temperature, and probed with the primary antibodies at 4 C overnight. After  
507 washing with TBST, blots were incubated with horseradish peroxidase (HRP)-  
508 conjugated secondary antibodies for 1 h at room temperature, washed again with TBST,  
509 and developed using SuperSignal West Pico or Femto chemiluminescent substrate  
510 according to the manufacturer's instructions (ThermoFisher). The antibodies used are as  
511 follows: rabbit anti-COMMD3 (proteintech #26240-1-AP, 1:800), rabbit anti-VPS35  
512 (proteintech #10236-1-AP,1:500), rabbit anti-CCDC22 (proteintech #16636-1-AP,  
513 1:1000), rabbit anti-NPC1 (proteintech #13926-1-AP, 1:1000), rabbit anti-NPC2  
514 (proteintech #19888-1-AP, 1:800), rabbit anti-CCDC53 (proteintech #24445-1-AP, 1:500),  
515 rabbit anti-COMMD1 (proteintech #11938-1-AP, 1:2000), mouse anti-SNX27 (Abcam  
516 #ab77799, 1:1000), rabbit anti-SNX17 (proteintech, #10275-1-AP, 1:2000), rabbit anti-  
517 LDLR (proteintech, #10785-1-AP, 1:1000), rabbit anti-LRP1 (Abcam #ab92544, 1:5000),  
518 rabbit anti-SARS-Cov-2 spike S2 (Sino Biological #40590-T62, 1:1000), rabbit anti-β-

519 actin (proteintech #20536-1-AP, 1:2000). The HRP-conjugated secondary antibodies  
520 include: Goat anti-mouse (sigma #A4416, 1:5000), goat anti-rabbit (thermo fisher  
521 #31460, 1:5000), goat anti-human (sigma #A6029, 1:5000).

522 For quantification studies, after probing with primary antibodies, membranes  
523 were incubated with goat anti-rabbit IRDye 800CW secondary antibody (LI-COR #926-  
524 32211, 1:10000), goat anti-rabbit IRDye 680RD secondary antibody (LI-COR #926-  
525 68071, 1:10000) or goat anti-mouse IRDye 800CW secondary antibody (LI-COR #926-  
526 32210, 1:10000), then developed and analyzed with the Odyssey CLx Imaging System.

527 **Biotinylation of plasma membrane proteins.** Gene-edited A549-ACE or Calu-  
528 3 cells seeded in 6-well plate 24 h prior to experiment were chilled on ice for 10 min, and  
529 labeled with 2.5 mg/ml Biotin (Thermo fisher #21331) in PBS for 30 min on ice. Cells  
530 were quenched with 100 mM glycine in PBS 3 times, 10 min each. After washing with  
531 PBS, cells were lysed in RIPA buffer (Cell Signaling #9806S) with a cocktail of protease  
532 inhibitors (Sigma-Aldrich # S8830), and immunoprecipitated with Streptavidin agarose  
533 beads overnight at 4°C. Beads were then washed three times with RIPA buffer, and  
534 eluted into 5x loading buffer (Beyotime #P0015L) at 95°C for 10min. After spinning at  
535 maximum speed for 10 min, the supernatants were harvested for western blotting using  
536 rabbit anti-ACE2 (Abcam #ab15348, 1:1000) as described above, and analyzed with the  
537 Odyssey CLx Imaging System. The un-immunoprecipitated lysates were used as loading  
538 control.

539 **Immunofluorescence assay.** Virus-infected cells were washed twice with PBS,  
540 fixed with 4% paraformaldehyde in PBS for 30 min, permeabilized with 0.2% Triton X-100  
541 for 1 h. Cells were then incubated with house-made mouse anti-SARS-CoV-2  
542 nucleocapsid protein serum (1:1000) at 4 °C overnight. After three washes, cells were  
543 incubated with the secondary goat anti-mouse antibody conjugated with Alexa Fluor 555  
544 (Thermo #A-21424, 2 µg/ml) for 2 h at room temperature, followed by staining with 4',6-

545 diamidino-2-phenylindole (DAPI). Images were collected using an Operetta High Content  
546 Imaging System (PerkinElmer), and processed using the ImageJ program  
547 (<http://rsb.info.nih.gov/ij/>).

548 **Cell viability assay.** A CellTiter-Glo<sup>®</sup> Luminescent Cell Viability Assay (Promega  
549 # G7570) was performed according to the manufacturer's instructions. The same  
550 number of gene-edited cells was seeded into opaque-walled 96-well plates. 48 h later,  
551 CellTiter-Glo<sup>®</sup> reagent was added to each well and allowed to shake for 2 min. After  
552 incubation at room temperature for 10 min, luminescence was recorded by using a  
553 FlexStation 3 (Molecular Devices) with an integration time of 0.5 second per well.

554 **Animal experiments.** Six to ten week-old male hamsters were used in the study  
555 in the BSL-3 laboratory of Fudan University. The experiment protocol has been  
556 approved by the Animal Ethics Committee of School of Basic Medical Sciences at Fudan  
557 University. The hamsters were inoculated intranasally with  $5 \times 10^4$  focus-forming unit  
558 (FFU) of Sfull or Sdel virus. To evaluate the viral transmission by direct contact, at day 1  
559 post-infection, each hamster infected with Sfull or Sdel was transferred to a new cage  
560 and co-housed with one age-matched naïve hamster for three days. At 24 h, 48 h, and  
561 96 h post virus challenge, or 72 h post contact, animals were euthanized and the sera  
562 were collected. After perfusion extensively with PBS, indicated tissues were harvested  
563 for virus titration by focus-forming assay in the presence of trypsin or histopathological  
564 examination. To collect fecal samples, at 48 h and 96 h post challenge, each hamster  
565 was put into an individual clean container and fresh fecal samples (5 pieces) were  
566 collected and frozen down for virus titration by focus-forming assay or RT-qPCR analysis.  
567 To monitor the body weight change, hamsters were measured daily for 14 days. Tissues  
568 were homogenized in DMEM and virus was titrated by focus-forming assay (FFA)(Pal et  
569 al., 2013) using the rabbit polyclonal antibody against SARS-CoV nucleocapsid protein

570 (Rockland, 200-401-A50, 0.5µg/ml) or by RT-qPCR after RNA extraction as described  
571 below.

572 **Histology and RNA *in situ* hybridization.** Virus-infected hamsters were  
573 euthanized and perfused extensively with PBS. Nasal turbinate and lung tissues were  
574 harvested and fixed in 4% paraformaldehyde (PFA) for 48 h. Tissues were embedded in  
575 paraffin for sectioning and stained with hematoxylin and eosin (H&E) to assess tissue  
576 morphology. To determine sites of virus infection, RNA *in situ* hybridization was  
577 performed using the RNAscope 2.5 HD Assay (Red Kit) according to the manufacturer's  
578 instructions (Advanced Cell Diagnostics). In brief, sections were deparaffinized, treated  
579 with H<sub>2</sub>O<sub>2</sub> and Protease Plus prior to probe hybridization. A probe specifically targeting  
580 the SARS-CoV-2 spike RNA (Advanced Cell Diagnostics, #848561) was used for *in situ*  
581 hybridization (ISH) experiments. Tissues were counterstained with Gill's hematoxylin.  
582 Tissue sections were visualized using a Nikon Eclipse microscope.

583 **qRT-PCR.** RNA from serum, tissues, or cells was extracted with the TRIzol  
584 reagent (ThermoFisher #15596018). Viral or host RNA levels were determined using the  
585 TaqPath™ 1-Step RT-qPCR Master Mix (ThermoFisher # A15299) on CFX Connect  
586 Real-Time System (Bio-Rad) instrument. A standard curve was produced using serial  
587 10-fold dilutions of *in vitro* transcribed RNA of N gene driven by the SP6 promoter  
588 (ThermoFisher #AM1340). Viral burden was expressed on a log<sub>10</sub> scale as viral RNA  
589 copies per g of tissue or ml of serum. Primers and probes used are as follows: nCoV-N-  
590 Fwd: 5'-GACCCCAAATCAGCGAAAT-3'; nCoV-N-Rev: 5'-  
591 TCTGGTACTGCCAGTTGAATCTG-3'; nCoV-N-Probe: 5'-FAM-  
592 ACCCCGCATTACGTTTGGTGGACC-BHQ1-3'; hGAPDH-Fwd: 5'-  
593 TGCCTTCTTGCCTCTTGTCT-3'; hGAPDH-Rev: 5'- GGCTCACCATGTAGCACTCA-3';  
594 and GAPDH-Probe: 5'-FAM-TTTGGTCGTATTGGGCGCCTGG-BHQ1-3'.

595           **Virus load determination by focus-forming assay.** The experiment was  
596 performed similarly as previously described(Brien et al., 2013). Briefly, Vero E6  
597 monolayer in 96-well plates were inoculated with serially diluted virus for 2 h and then  
598 overlaid with methylcellulose for 48 h. Cells were fixed with 4% paraformaldehyde in  
599 PBS for 1 h and permeablized with 0.2% Triton X-100 for 1 h. Cells were stained with  
600 rabbit polyclonal antibody against SARS-CoV nucleocapsid protein (Rockland, 200-401-  
601 A50, 0.5µg/ml) overnight at 4°C, incubated with the secondary goat anti-rabbit HRP-  
602 conjugated antibody for 2 h at room temperature. The focus-forming unit was developed  
603 using TrueBlue substrate (Sera Care #5510-0030).

604           **Statistical analysis.** Statistical significance was assigned when *P* values were <  
605 0.05 using Prism Version 8 (GraphPad). Data analysis was determined by a Mann-  
606 Whitney, or ANOVA, or unpaired t-test depending on data distribution and the number of  
607 comparison groups.

608           **Data Availability.** The authors declare that all data supporting the findings of this  
609 study are available within the paper and its Supplementary information. The  
610 Supplemental Tables provide data for the CRISPR-Cas9 screen, statistical analysis.

611

612

## 613 **ACKNOWLEDGEMENTS**

614           Grants from the National Natural Science Foundation of China (32041005 to  
615 R.Z.), National Key Research and Development Program of China (2020YFA0707701 to  
616 R.Z.), Project of Novel Coronavirus Research of Fudan University (to Y.X.), and  
617 Development Programs for COVID-19 of Shanghai Science and Technology  
618 Commission (20431900401) supported this work. We thank Prof. Michael S. Diamond  
619 (Washington University) for discussions and editorial comments on the manuscript. We  
620 also thank Prof. Bin Zhou (Nanjing Agricultural University) for providing key reagents.



621 We wish to acknowledge colleagues at the Biosafety Level 3 Laboratory of Fudan  
622 University for help with experiment design and technical assistance.

623

#### 624 **AUTHOR CONTRIBUTIONS**

625 Y.Z., F.F., G.H., Y.W., Y.Y., Y.Z., W.X., R.Z. performed the experiments. Y.Z.,  
626 F.F., G.H., Y.W., R.Z. designed the experiments. X.C., Z.S., W.H., Q.D., H.C., Q.C.,  
627 D.Q., Y.X., Z.Y. provided administrative, supervision, technical, or material support. Y.Z.,  
628 F.F., G.H., Y.W., Y.Y., R.Z. performed data analysis. R.Z. wrote the initial draft of the  
629 manuscript, with the other authors contributing to editing into the final form.

630

#### 631 **COMPETING FINANCIAL INTERESTS**

632 None.

633

#### 634 **FIGURE LEGENDS**

635 **Figure 1. SARS-CoV-2 bearing the deletion at the S1/S2 junction site of**  
636 **spike protein preferentially enters cells through the endosomal pathway. A.**  
637 Sequence alignment of spike protein encompassing the cleavage site between S1 and  
638 S2 subunits. The spike proteins of SARS-CoV-2 without (Sfull strain) and with (Sdel  
639 strain) deletion were used to compare with that of SARS-CoV. The insertion of multi-  
640 basic amino acids in spike protein of SARS-CoV-2 was shown in red. **B.** Comparison of  
641 the replication property between Sfull and Sdel strains in different cell lines. The  
642 percentage of nucleocapsid (N) protein positive cells was analyzed by imaging-based  
643 analysis following virus infection. Data shown are an average of two independent  
644 experiments performed in triplicate. **C.** The immunofluorescence staining of N protein in  
645 A549-ACE2 and Calu-3 cells infected with Sfull or Sdel virus. A representative of two  
646 independent experiments was shown. **D.** Assessment of live virus production in different

647 cell lines infected with Sfull or Sdel strain. Data are pooled from two independent  
648 experiments conducted in triplicate. **E.** Evaluation of entry efficiency in different cell lines  
649 infected with pseudoviruses bearing spike protein Sfull, Sdel, or S mutant (R682S,  
650 R685S). Data shown are an average of two independent experiments performed in  
651 triplicate and are normalized to the Sfull of individual experiments. **F.** Effect of TMPRSS2  
652 serine protease inhibitor Camostat and cysteine protease inhibitor E-64d on Sfull or Sdel  
653 infection in different cell lines. Data shown are an average of two independent  
654 experiments performed in duplicate or triplicate and are normalized to the untreated  
655 group of individual experiments. One-way ANOVA with Dunnett's test (A, B, C); two-way  
656 ANOVA with Sidak's test (B); \*\*\*\*P < 0.0001; ns, not significant.

657 **Figure 2. Genome-wide CRISPR/Cas9 screen identifies genes and pathways**  
658 **required for SARS-CoV-2 infection. A.** Schematic of the screening process. A549 cells  
659 expressing the human ACE2 were used to generate the CRISPR sgRNA knockout cell  
660 library. The library was infected with Sdel strain of SARS-CoV-2, and cells survived were  
661 harvested for genomic extraction and sequence analysis. **B.** Genes and complexes  
662 identified from the CRISPR screen. Of the top 36 hits (FDR<0.15), the validated genes  
663 (from Figure 2C) were indicated based the MAGeCK score. **C.** Top 36 genes were  
664 selected for experimental validation in A549-ACE2 cells using two independent sgRNAs  
665 by Sdel live virus infection, and only the 32 genes that showed statistic significance were  
666 indicated. Data shown are an average of two independent experiments performed in  
667 triplicate and are normalized to the controls of individual experiments. One-way ANOVA  
668 with Dunnett's test; \*\*\*\*P < 0.0001.

669 **Figure 3. Genes identified are required for the cell entry of SARS-CoV-2,**  
670 **SARS-CoV, and MERS-CoV. A-D.** The genes (selected from Figure 2C) were verified  
671 for the infection by pseudovirus bearing the spike protein of SARS-CoV-2 Sdel strain (A),  
672 the the glycoprotein of vesicular stomatitis virus (VSV-G) (B), the spike protein of SARS-

673 CoV (C), or the spike protein of MERS-CoV (D). One representative sgRNA per gene  
674 was used in A549-ACE2 cells. **E.** The genes selected were verified for the infection by  
675 the SARS-CoV-2 Sfull live virus. **F.** Effect of NPC1 inhibitor U18666A on virus infection.  
676 Cells were treated with U18666A at the indicated concentrations 2 h prior to or 2 h post  
677 infection by Sfull or Sdel live virus. The viral N-positive cells were calculated. Data  
678 shown are an average of two independent experiments performed in duplicate or  
679 triplicate and are normalized to the controls of individual experiments. One-way ANOVA  
680 with Dunnett's test; \*\*P < 0.01; \*\*\*, P < 0.001; \*\*\*\*P < 0.0001; ns, not significant.

681 **Figure 4. Genes identified are required for virus entry by regulating the**  
682 **expression of receptor ACE2. A.** The effect on virion binding and internalization in  
683 gene-edited cells. A549-ACE2 cells were incubated with SARS-CoV-2 Sfull infectious  
684 virus on ice for binding or then switched to 37°C for internalization. Viral RNA was  
685 extracted for RT-qPCR analysis. Data shown are an average of two independent  
686 experiments performed in duplicate and are normalized to the controls of individual  
687 experiments. **B-C.** Surface expression of receptor ACE2 was decreased in gene-edited  
688 cells as measured by flow cytometry using S1-Fc recombinant protein or anti-ACE2  
689 antibody. **D-E.** Surface and total expression of receptor ACE2 were decreased in gene-  
690 edited cells. The plasma membrane proteins were biotin-labeled and  
691 immunoprecipitated by streptavidin beads for Western blotting. One representative blot  
692 was shown (D) and Data are pooled from four independent experiments, quantified, and  
693 normalized to the controls of individual experiments (E). One-way ANOVA with Dunnett's  
694 test (A, B, C, E); \*P < 0.05; \*\*P < 0.01; \*\*\*, P < 0.001; \*\*\*\*P < 0.0001; ns, not significant.  
695 **F-G.** The impact on viral production in CCDC53 gene-edited Calu-3 cells. The gene  
696 CCDC53 with significant reduction in virion internalization in Figure 4 (A) was selected  
697 for CRISPR sgRNA editing. The mixed cell population was infected with Sfull (F) or Sdel  
698 (G) to assess the virus yield. Two-way ANOVA with Sidak's test; \*\*\*\*P < 0.0001.

699 **Figure 5. The S1/S2 boundary of SARS-CoV-2 spike protein modulates the**  
700 **infection and transmission in golden Syrian hamster model. A.** Viral load in the  
701 tissues of nasal turbinate, trachea, and lung. Tissues were harvested at day 1, 2 and 4  
702 post-challenge of Sfull or Sdel virus (n=6 per day). **B.** Viral RNA in fecal samples. Fresh  
703 fecal samples were collected at day 2 and 4 post-infection of Sfull or Sdel strain (n=6 per  
704 day) for qRT-PCR. **C.** Transmission of Sfull or Sdel strain in hamsters by direct contact  
705 exposure. Naïve hamsters (n=6) were each co-housed with one inoculated donor at day  
706 1 for three days. Hamsters were sacrificed and the indicated tissues were harvested for  
707 titration. The dashed lines represent the limit of detection by focus-forming assay. Mean  
708 fecal sample weight (B): two-tailed unpaired t-test; median viral titers (A, B, C): two-tailed  
709 Mann–Whitney test \*P < 0.05; \*\*P < 0.01; ns, not significant. **D.** H&E staining of lung  
710 sections of contact hamsters. Representative images are shown from n = 6 hamsters.  
711 Scale bar, 100µm. **E-F.** RNA ISH of lung and nasal turbinate sections of contact  
712 hamsters. Representative images are shown from n = 6 hamsters. Scale bar, 100µm. **G.**  
713 Model of the role of S1/S2 boundary in cell entry, pathogenicity, and transmissibility of  
714 SARS-CoV-2. SARS-CoV-2 with intact spike protein (Sfull virus) preferentially enters  
715 cells at the plasma membrane (early entry pathway) in respiratory tract tissues  
716 expressing the proteases (e.g., TMPRSS2) to activate the membrane fusion. The virus  
717 (Sdel) with deletion at S1/S2 junction site in spike, however, tends to enter via  
718 endosomal pathway (late entry pathway). Both entry pathways are initiated with virion  
719 binding to cellular receptor ACE2 that is regulated by host factors including retromer,  
720 CCC, and WASH complexes, etc. The more efficient early entry pathway in respiratory  
721 tract with intact spike protein than the late pathway promotes virus production,  
722 pathogenesis, and transmission in a hamster model. The SARS-CoV with spike lacking  
723 the insertion of multi-basic amino acids may resemble the Sdel virus and enter cell less  
724 efficiently than SARS-CoV-2 resulting in relatively low transmissibility.

725

726 **FIGURE SLEGENDS**

727 **Figure S1. The acquisition of Sfull and Sdel clones of SARS-CoV-2. A.**  
728 SARS-CoV-2 SH01 strain isolated from a patient sample was purified three times by  
729 plaque assay on Vero-E6 (thereafter as Vero) cells in the presence of trypsin, resulting  
730 the clone of Sfull virus. The Sdel clone was obtained by passaging the Sfull virus twice  
731 and plaque-purified once on Vero cells without trypsin. The trace results of Sanger  
732 sequencing were generated by SnapGene Viewer, and the 21 nucleotide (nt) deletion  
733 was indicated. **B.** The Sfull strain was passaged twice on Vero cells in the presence of  
734 trypsin. **C.** The Sfull strain was passaged twice on Vero cells expressing the TMPRSS2  
735 in the absence of trypsin. **d.** The sequence alignment of SARS-CoV-2 strains. The full-  
736 length genome sequences obtained by RT-PCR and Sanger sequencing were aligned  
737 and compared to the stain Wuhan-Hu-1. Wuhan-Hu-1, accession No. MN908947; SH01,  
738 accession No. MT121215.

739 **Figure S2. The replication and entry property of Sfull and Sdel clones of**  
740 **SARS-CoV-2 and SARS-CoV pseudovirus. A.** Immunofluorescence staining of the  
741 nucleocapsid (N) protein of Sfull or Sdel virus on wild type Vero, Vero with trypsin  
742 treatment, and Vero expressing the TMPRSS2 cells. Virus-infected cells were fixed,  
743 permeablized, and stained with the house-made mouse anti-nucleocapsid serum. After  
744 washing, cells were incubated with goat anti-mouse antibody conjugated with Alexa  
745 Fluor 555 (Thermo # A-21424, 2 µg/ml), followed by staining with 4',6-diamidino-2-  
746 phenylindole (DAPI). Images were collected using an Operetta High Content Imaging  
747 System (PerkinElmer), and processed using the ImageJ software. **B.** The effect of  
748 compounds Comostat and E-64d on the infection by Sfull or Sdel virus in different cell  
749 types. Cells were pretreated with 25 µM compounds Camostat or / and E-64d and  
750 infected with Sfull or Sdel virus in the presence of compounds for 24 h.

751 Immunofluorescence assay was conducted as described above. **C.** Sfull infection on  
752 A549-ACE2 cells were resistant to the treatment of 50  $\mu$ M or 100  $\mu$ M of Comostat or /  
753 and E-64d. Cells were pretreated with the indicated compounds and infected with the  
754 Sfull virus in the presence of compounds, followed by Immunofluorescence staining as  
755 described above. **D-E.** The effect of compounds Comostat and E-64d on the infection by  
756 SARS-CoV or MERS-CoV pseudovirus in different cell types. Cells were pretreated with  
757 25  $\mu$ M compounds Camostat or / and E-64d and infected with Sfull or Sdel pseudovirus  
758 in the presence of compounds for 48 h. One-way ANOVA with Dunnett's test \*P < 0.05;  
759 \*\*\*, P < 0.001; \*\*\*\*P < 0.0001; ns, not significant. Immunofluorescence assay was  
760 conducted as described above. Data were pooled from two independent experiments  
761 performed in triplicate, and are normalized to the controls of individual experiments.

762 **Figure S3. The cleavage of spike protein in different cell types and editing**  
763 **efficiency of A549-ACE2 cells by CRISPR sgRNA of genes selected. A.** Western  
764 blotting of cell lysates of different cell types or conditions inoculated with Sfull or Sdel  
765 virus. The cell lysates were probed with rabbit anti-SARS-CoV-2 spike S2 antibody (Sino  
766 Biological #40590-T62), followed by incubating with horseradish peroxidase (HRP)-  
767 conjugated goat anti-rabbit polyclonal antibody and developed using SuperSignal West  
768 Pico chemiluminescent substrate. The bands corresponding to the full-length spike (S)  
769 and cleaved S2 subunit are indicated by arrows. **B.** Editing efficiency of A549-ACE2  
770 cells by CRISPR sgRNA of genes selected. Genes in A549-ACE2 cells were edited by  
771 the indicated sgRNAs and the mixed population of cells was subjected to western  
772 blotting. Cell lysates were probed with rabbit anti-COMMD3 (proteintech #26240-1-AP),  
773 CCDC22 (proteintech #16636-1-AP), CCDC53 (proteintech #24445-1-AP), VPS35  
774 (proteintech #10236-1-AP), NPC1 (proteintech #13926-1-AP), or NPC2 (proteintech  
775 #19888-1-AP) polyclonal antibody, followed by incubating with horseradish peroxidase

776 (HRP)-conjugated goat anti-rabbit polyclonal antibody and developed using SuperSignal  
777 West Pico or Femto chemiluminescent substrate.

778 **Figure S4. Validation of virus infection and cell viability in HeLa-ACE2 or**  
779 **A549-ACE2 cells. A.** HeLa cells expressing the human ACE2 were edited by three  
780 different sgRNAs of selected genes. Cells were infected with Sdel virus and subjected to  
781 immunofluorescence assay and high-content imaging as described in Methods. Data  
782 were pooled from two independent experiments performed in triplicate, and are  
783 normalized to the controls of individual experiments. **B.** Viability of A549-ACE2 cells  
784 edited with individual CRISPR sgRNA of genes selected. An equal number of cells were  
785 plated and viability was assessed over a 48 h period using the Cell-Titer Glo assay. The  
786 results were normalized to control cells and are pooled from two independent  
787 experiments performed in duplicate.

788 **Figure S5. Validation of genes related to cargo retrieval and recycling in**  
789 **A549-ACE2 cells. A.** A549 cells expressing the human ACE2 were edited by three  
790 different sgRNAs of selected genes. Cells were infected with Sdel virus and subjected to  
791 immunofluorescence assay and high-content imaging as described in Methods. Data  
792 were pooled from two independent experiments performed in triplicate, and are  
793 normalized to the controls of individual experiments. One-way ANOVA with Dunnett's  
794 test \*\*\*\*P < 0.0001, mean  $\pm$  SD. **B.** Western blotting to confirm the editing efficiency in  
795 A549-ACE2 cells by the indicated sgRNAs. Cell lysates were probed with mouse anti-  
796 SNX27 (Abcam #ab77799) or rabbit anti-SNX17 (proteintech, #10275-1-AP) polyclonal  
797 antibody, followed by incubating with horseradish peroxidase (HRP)-conjugated goat  
798 anti-mouse or rabbit polyclonal antibody, and developed using SuperSignal West Pico or  
799 Femto chemiluminescent substrate.

800 **Figure S6. Validation of COMMD protein family members and cholesterol**  
801 **uptake related genes in A549-ACE2 or HeLa-ACE2 cells. A.** COMMD1, 6, and 9, and

802 genes related to cholesterol uptake are not required for Sdel virus infection. A549 or  
803 HeLa cells expressing the human ACE2 were edited by three different sgRNAs of the  
804 indicated genes. Cells were infected with Sdel virus and subjected to  
805 immunofluorescence assay and high-content imaging as described in Methods. Data  
806 were pooled from two independent experiments performed in triplicate, and are  
807 normalized to the controls of individual experiments. **B.** Western blotting to verify the  
808 editing efficiency of COMMD1, LDLR, and LRP1 genes in A549-ACE2 cells by the  
809 indicated sgRNAs. **c.** Western blotting to verify the expression of COMMD1, COMMD3,  
810 or CCDC22 affected by gene-editing. Cell lysates were probed with rabbit anti-COMMD1  
811 (proteintech #11938-1-AP), LDLR (proteintech, #10785-1-AP), LRP1 (Abcam  
812 #ab92544), rabbit anti-COMMD3 (proteintech #26240-1-AP), or rabbit anti-CCDC22  
813 (proteintech #16636-1-AP) polyclonal antibody, followed by incubating with horseradish  
814 peroxidase (HRP)-conjugated goat anti-rabbit polyclonal antibody and developed using  
815 SuperSignal West Pico or Femto chemiluminescent substrate.

816 **Figure S7. Viral load in different tissues, body weight change and lung**  
817 **histology. A-G.** 6-8 week-old hamsters were infected intranasally and serum (day 1, 2,  
818 4) and tissues from intestine, brain, heart, liver, spleen, and kidney (day 2, 4) were  
819 harvested (n=6 per day). Viral RNAs were extracted for RT-qPCR analysis. The viral  
820 load in the brain was also titrated by focus-forming assay. The dashed lines represent  
821 the limit of detection by focus-forming assay. Median viral titers: two-tailed Mann-  
822 Whitney test \*P < 0.05; \*\*P < 0.01; ns, not significant. **H.** Body weight change of  
823 hamsters inoculated intranasally with Sfull or Sdel virus. 6-8 week-old hamsters (n=6)  
824 were infected with Sfull or Sdel virus and the body weight was measured daily until day  
825 14. Mean body weight: two-way ANOVA with Sidak's test \*P < 0.05; \*\*P < 0.01; \*\*\*, P <  
826 0.001; \*\*\*\*P < 0.0001.

827



828 **SUPPLEMENTAL TABLE LEGENDS**

829 **Supplementary Table 1. List of genes and scores after MaGeck analysis**

830 **(see Excel file).** Data was obtained by deep-sequencing of sgRNAs from uninfected or  
831 survived cells.

832 **Supplementary Table 2. sgRNA sequences of genes selected for validation**  
833 **and other editing experiments (see Excel file).**

834

835 **REFERENCES**

836

837 Ballout, R.A., Sviridov, D., Bukrinsky, M.I., and Remaley, A.T. (2020). The lysosome: A  
838 potential juncture between SARS-CoV-2 infectivity and Niemann-Pick disease type C,  
839 with therapeutic implications. *FASEB journal : official publication of the Federation of*  
840 *American Societies for Experimental Biology* 34, 7253-7264.

841 Bartuzi, P., Billadeau, D.D., Favier, R., Rong, S., Dekker, D., Fedoseienko, A., Fieten,  
842 H., Wijers, M., Levels, J.H., Huijkman, N., *et al.* (2016). CCC- and WASH-mediated  
843 endosomal sorting of LDLR is required for normal clearance of circulating LDL. *Nature*  
844 *communications* 7, 10961.

845 Boulware, D.R., Pullen, M.F., Bangdiwala, A.S., Pastick, K.A., Lofgren, S.M., Okafor,  
846 E.C., Skipper, C.P., Nascene, A.A., Nicol, M.R., Abassi, M., *et al.* (2020). A  
847 Randomized Trial of Hydroxychloroquine as Postexposure Prophylaxis for Covid-19.  
848 *New England Journal of Medicine*.

849 Brien, J.D., Lazear, H.M., and Diamond, M.S. (2013). Propagation, quantification,  
850 detection, and storage of West Nile virus. *Current protocols in microbiology* 31, 15D 13  
851 11-15D 13 18.

852 Burd, C., and Cullen, P.J. (2014). Retromer: a master conductor of endosome sorting.  
853 *Cold Spring Harbor perspectives in biology* 6.

854 Burstein, E., Hoberg, J.E., Wilkinson, A.S., Rumble, J.M., Csomos, R.A., Komarck,  
855 C.M., Maine, G.N., Wilkinson, J.C., Mayo, M.W., and Duckett, C.S. (2005). COMMD  
856 proteins, a novel family of structural and functional homologs of MURR1. *The Journal of*  
857 *biological chemistry* 280, 22222-22232.

858 Cenedella, R.J. (2009). Cholesterol synthesis inhibitor U18666A and the role of sterol  
859 metabolism and trafficking in numerous pathophysiological processes. *Lipids* 44, 477-  
860 487.

861 Cespedes, M.d.S., and Souza, J.C.R.P.d. (2020). Sars-CoV-2: A clinical update - II.  
862 *Revista da Associação Médica Brasileira* 66, 547-557.

863 Chen, J. (2020). Pathogenicity and transmissibility of 2019-nCoV-A quick overview and  
864 comparison with other emerging viruses. *Microbes and infection* 22, 69-71.

865 Cologna, S.M., and Rosenhouse-Dantsker, A. (2019). Insights into the Molecular  
866 Mechanisms of Cholesterol Binding to the NPC1 and NPC2 Proteins. *Advances in*  
867 *experimental medicine and biology* 1135, 139-160.

868 Doench, J.G., Fusi, N., Sullender, M., Hegde, M., Vaimberg, E.W., Donovan, K.F.,  
869 Smith, I., Tothova, Z., Wilen, C., Orchard, R., *et al.* (2016). Optimized sgRNA design to  
870 maximize activity and minimize off-target effects of CRISPR-Cas9. *Nature*  
871 *biotechnology* 34, 184-191.

872 Doki, T., Tarusawa, T., Hohdatsu, T., and Takano, T. (2020). In Vivo Antiviral Effects of  
873 U18666A Against Type I Feline Infectious Peritonitis Virus. *Pathogens* 9.

874 Fedoseienko, A., Wijers, M., Wolters, J.C., Dekker, D., Smit, M., Huijkman, N.,  
875 Kloosterhuis, N., Klug, H., Schepers, A., Willems van Dijk, K., *et al.* (2018). The  
876 COMMD Family Regulates Plasma LDL Levels and Attenuates Atherosclerosis Through  
877 Stabilizing the CCC Complex in Endosomal LDLR Trafficking. *Circulation research* 122,  
878 1648-1660.

879 Hoffmann, M., Kleine-Weber, H., and Pohlmann, S. (2020a). A Multibasic Cleavage Site  
880 in the Spike Protein of SARS-CoV-2 Is Essential for Infection of Human Lung Cells.  
881 *Molecular cell* 78, 779-784 e775.

882 Hoffmann, M., Kleine-Weber, H., Schroeder, S., Kruger, N., Herrler, T., Erichsen, S.,  
883 Schiergens, T.S., Herrler, G., Wu, N.H., Nitsche, A., *et al.* (2020b). SARS-CoV-2 Cell  
884 Entry Depends on ACE2 and TMPRSS2 and Is Blocked by a Clinically Proven Protease  
885 Inhibitor. *Cell* 181, 271-280 e278.

886 Hoffmann, M., Mosbauer, K., Hofmann-Winkler, H., Kaul, A., Kleine-Weber, H.,  
887 Kruger, N., Gassen, N.C., Muller, M.A., Drosten, C., and Pohlmann, S. (2020c).  
888 Chloroquine does not inhibit infection of human lung cells with SARS-CoV-2. *Nature*.

889 Hui, K.P.Y., Cheung, M.C., Perera, R., Ng, K.C., Bui, C.H.T., Ho, J.C.W., Ng, M.M.T.,  
890 Kuok, D.I.T., Shih, K.C., Tsao, S.W., *et al.* (2020). Tropism, replication competence, and  
891 innate immune responses of the coronavirus SARS-CoV-2 in human respiratory tract and  
892 conjunctiva: an analysis in ex-vivo and in-vitro cultures. *The Lancet Respiratory*  
893 *medicine* 8, 687-695.

894 Iwata-Yoshikawa, N., Okamura, T., Shimizu, Y., Hasegawa, H., Takeda, M., and Nagata,  
895 N. (2019). TMPRSS2 Contributes to Virus Spread and Immunopathology in the Airways  
896 of Murine Models after Coronavirus Infection. *Journal of virology* 93.

897 Joung, J., Konermann, S., Gootenberg, J.S., Abudayyeh, O.O., Platt, R.J., Brigham,  
898 M.D., Sanjana, N.E., and Zhang, F. (2017). Genome-scale CRISPR-Cas9 knockout and  
899 transcriptional activation screening. *Nat Protoc* 12, 828-863.

900 Karakus, U., Thamamongood, T., Ciminski, K., Ran, W., Gunther, S.C., Pohl, M.O.,  
901 Eletto, D., Jeney, C., Hoffmann, D., Reiche, S., *et al.* (2019). MHC class II proteins  
902 mediate cross-species entry of bat influenza viruses. *Nature*.

903 Ko, D.C., Gordon, M.D., Jin, J.Y., and Scott, M.P. (2001). Dynamic movements of  
904 organelles containing Niemann-Pick C1 protein: NPC1 involvement in late endocytic  
905 events. *Molecular biology of the cell* 12, 601-614.

906 Kupferschmidt, K. Big studies dim hopes for hydroxychloroquine.

907 Lau, S.Y., Wang, P., Mok, B.W., Zhang, A.J., Chu, H., Lee, A.C., Deng, S., Chen, P.,  
908 Chan, K.H., Song, W., *et al.* (2020). Attenuated SARS-CoV-2 variants with deletions at  
909 the S1/S2 junction. *Emerging microbes & infections* 9, 837-842.

910 Li, H., Koo, Y., Mao, X., Sifuentes-Dominguez, L., Morris, L.L., Jia, D., Miyata, N.,  
911 Faulkner, R.A., van Deursen, J.M., Vooijs, M., *et al.* (2015). Endosomal sorting of Notch  
912 receptors through COMMD9-dependent pathways modulates Notch signaling. *The*  
913 *Journal of cell biology* 211, 605-617.

- 914 Li, J., Ding, S.C., Cho, H., Chung, B.C., Gale, M., Jr., Chanda, S.K., and Diamond, M.S.  
915 (2013). A short hairpin RNA screen of interferon-stimulated genes identifies a novel  
916 negative regulator of the cellular antiviral response. *mBio* *4*, e00385-00313.
- 917 Li, Q., Guan, X., Wu, P., Wang, X., Zhou, L., Tong, Y., Ren, R., Leung, K.S.M., Lau,  
918 E.H.Y., Wong, J.Y., *et al.* (2020). Early Transmission Dynamics in Wuhan, China, of  
919 Novel Coronavirus-Infected Pneumonia. *The New England journal of medicine* *382*,  
920 1199-1207.
- 921 Li, W., Xu, H., Xiao, T., Cong, L., Love, M.I., Zhang, F., Irizarry, R.A., Liu, J.S., Brown,  
922 M., and Liu, X.S. (2014). MAGeCK enables robust identification of essential genes from  
923 genome-scale CRISPR/Cas9 knockout screens. *Genome biology* *15*, 554.
- 924 Liu, K., Jian, Y., Sun, X., Yang, C., Gao, Z., Zhang, Z., Liu, X., Li, Y., Xu, J., Jing, Y., *et*  
925 *al.* (2016). Negative regulation of phosphatidylinositol 3-phosphate levels in early-to-late  
926 endosome conversion. *The Journal of cell biology* *212*, 181-198.
- 927 Liu, Z., Zheng, H., Yuan, R., Li, M., Lin, H., Peng, J., Xiong, Q., Sun, J., Li, B., Wu, J.,  
928 *et al.* (2020). Identification of a common deletion in the spike protein of SARS-CoV-2.  
929 bioRxiv, 2020.2003.2031.015941.
- 930 Lu, F., Liang, Q., Abi-Mosleh, L., Das, A., De Brabander, J.K., Goldstein, J.L., and  
931 Brown, M.S. (2015). Identification of NPC1 as the target of U18666A, an inhibitor of  
932 lysosomal cholesterol export and Ebola infection. *eLife* *4*.
- 933 Marceau, C.D., Puschnik, A.S., Majzoub, K., Ooi, Y.S., Brewer, S.M., Fuchs, G.,  
934 Swaminathan, K., Mata, M.A., Elias, J.E., Sarnow, P., *et al.* (2016). Genetic dissection of  
935 Flaviviridae host factors through genome-scale CRISPR screens. *Nature* *535*, 159-163.
- 936 Matsuyama, S., Nao, N., Shirato, K., Kawase, M., Saito, S., Takayama, I., Nagata, N.,  
937 Sekizuka, T., Katoh, H., Kato, F., *et al.* (2020). Enhanced isolation of SARS-CoV-2 by  
938 TMPRSS2-expressing cells. *Proceedings of the National Academy of Sciences of the*  
939 *United States of America* *117*, 7001-7003.
- 940 McMillan, K.J., Korswagen, H.C., and Cullen, P.J. (2017). The emerging role of retromer  
941 in neuroprotection. *Current opinion in cell biology* *47*, 72-82.
- 942 McNally, K.E., and Cullen, P.J. (2018). Endosomal Retrieval of Cargo: Retromer Is Not  
943 Alone. *Trends in cell biology* *28*, 807-822.
- 944 McNally, K.E., Faulkner, R., Steinberg, F., Gallon, M., Ghai, R., Pim, D., Langton, P.,  
945 Pearson, N., Danson, C.M., Nagele, H., *et al.* (2017). Retriever is a multiprotein complex  
946 for retromer-independent endosomal cargo recycling. *Nature cell biology* *19*, 1214-1225.
- 947 Norwood, S.J., Shaw, D.J., Cowieson, N.P., Owen, D.J., Teasdale, R.D., and Collins,  
948 B.M. (2011). Assembly and solution structure of the core retromer protein complex.  
949 *Traffic* *12*, 56-71.
- 950 Ogando, N.S., Dalebout, T.J., Zevenhoven-Dobbe, J.C., Limpens, R., van der Meer, Y.,  
951 Caly, L., Druce, J., de Vries, J.J.C., Kikkert, M., Barcena, M., *et al.* (2020). SARS-  
952 coronavirus-2 replication in Vero E6 cells: replication kinetics, rapid adaptation and  
953 cytopathology. *The Journal of general virology*.
- 954 Pal, P., Dowd, K.A., Brien, J.D., Edeling, M.A., Gorlatov, S., Johnson, S., Lee, I.,  
955 Akahata, W., Nabel, G.J., Richter, M.K.S., *et al.* (2013). Development of a highly  
956 protective combination monoclonal antibody therapy against Chikungunya virus *PLoS*  
957 *Pathog* *9*, e1003312.
- 958 Pfeffer, S.R. (2019). NPC intracellular cholesterol transporter 1 (NPC1)-mediated  
959 cholesterol export from lysosomes. *The Journal of biological chemistry* *294*, 1706-1709.

- 960 Phillips-Krawczak, C.A., Singla, A., Starokadomskyy, P., Deng, Z., Osborne, D.G., Li,  
961 H., Dick, C.J., Gomez, T.S., Koenecke, M., Zhang, J.S., *et al.* (2015). COMMD1 is  
962 linked to the WASH complex and regulates endosomal trafficking of the copper  
963 transporter ATP7A. *Molecular biology of the cell* *26*, 91-103.
- 964 Qi, J., Zhou, Y., Hua, J., Zhang, L., Bian, J., Liu, B., Zhao, Z., and Jin, S. (2020). The  
965 scRNA-seq expression profiling of the receptor ACE2 and the cellular protease  
966 TMPRSS2 reveals human organs susceptible to COVID-19 infection. *bioRxiv*,  
967 2020.2004.2016.045690.
- 968 Rapiteanu, R., Davis, L.J., Williamson, J.C., Timms, R.T., Paul Luzio, J., and Lehner,  
969 P.J. (2016). A Genetic Screen Identifies a Critical Role for the WDR81-WDR91  
970 Complex in the Trafficking and Degradation of Tetherin. *Traffic* *17*, 940-958.
- 971 Richardson, R.B., Ohlson, M.B., Eitson, J.L., Kumar, A., and McDougal, M.B. (2018). A  
972 CRISPR screen identifies IFI6 as an ER-resident interferon effector that blocks flavivirus  
973 replication. *3*, 1214-1223.
- 974 Sanjana, N.E., Shalem, O., and Zhang, F. (2014). Improved vectors and genome-wide  
975 libraries for CRISPR screening. *Nature methods* *11*, 783-784.
- 976 Shalem, O., Sanjana, N.E., Hartenian, E., Shi, X., Scott, D.A., Mikkelsen, T.S., Heckl,  
977 D., Ebert, B.L., Root, D.E., Doench, J.G., *et al.* (2014). Genome-scale CRISPR-Cas9  
978 knockout screening in human cells. *Science* *343*, 84-87.
- 979 Shang, J., Wan, Y., Luo, C., Ye, G., Geng, Q., Auerbach, A., and Li, F. (2020). Cell entry  
980 mechanisms of SARS-CoV-2. *Proceedings of the National Academy of Sciences of the*  
981 *United States of America* *117*, 11727-11734.
- 982 Simmons, G., Gosalia, D.N., Rennekamp, A.J., Reeves, J.D., Diamond, S.L., and Bates,  
983 P. (2005). Inhibitors of cathepsin L prevent severe acute respiratory syndrome  
984 coronavirus entry. *Proceedings of the National Academy of Sciences of the United States*  
985 *of America* *102*, 11876-11881.
- 986 Sturley, S.L., Rajakumar, T., Hammond, N., Higaki, K., Marka, Z., Marka, S., and  
987 Munkacsi, A.B. (2020). Potential COVID-19 therapeutics from a rare disease:  
988 weaponizing lipid dysregulation to combat viral infectivity. *Journal of lipid research* *61*,  
989 972-982.
- 990 Sungnak, W., Huang, N., Bécavin, C., Berg, M., and Network, H.C.A.L.B. (2020a).  
991 SARS-CoV-2 Entry Genes Are Most Highly Expressed in Nasal Goblet and Ciliated  
992 Cells within Human Airways. *ArXiv*, arXiv:2003.06122v06121.
- 993 Sungnak, W., Huang, N., Becavin, C., Berg, M., Queen, R., Litvinukova, M., Talavera-  
994 Lopez, C., Maatz, H., Reichart, D., Sampaziotis, F., *et al.* (2020b). SARS-CoV-2 entry  
995 factors are highly expressed in nasal epithelial cells together with innate immune genes.  
996 *Nature medicine* *26*, 681-687.
- 997 Takano, T., Endoh, M., Fukatsu, H., Sakurada, H., Doki, T., and Hohdatsu, T. (2017).  
998 The cholesterol transport inhibitor U18666A inhibits type I feline coronavirus infection.  
999 *Antiviral research* *145*, 96-102.
- 1000 Tang, T., Bidon, M., Jaimes, J.A., Whittaker, G.R., and Daniel, S. (2020). Coronavirus  
1001 membrane fusion mechanism offers a potential target for antiviral development. *Antiviral*  
1002 *research* *178*, 104792.
- 1003 Wang, H., Yuan, Z., Pavel, M.A., and Hansen, S.B. (2020a). The role of high cholesterol  
1004 in age-related COVID19 lethality. *bioRxiv*.

- 1005 Wang, Q., Qiu, Y., Li, J.Y., Zhou, Z.J., Liao, C.H., and Ge, X.Y. (2020b). A Unique  
1006 Protease Cleavage Site Predicted in the Spike Protein of the Novel Pneumonia  
1007 Coronavirus (2019-nCoV) Potentially Related to Viral Transmissibility. *Virologica*  
1008 *Sinica* 35, 337-339.
- 1009 Willett, R., Martina, J.A., Zewe, J.P., Wills, R., Hammond, G.R.V., and Puertollano, R.  
1010 (2017). TFEB regulates lysosomal positioning by modulating TMEM55B expression and  
1011 JIP4 recruitment to lysosomes. *Nature communications* 8, 1580.
- 1012 Wong, Y.C., Lau, S.Y., Wang To, K.K., Mok, B.W.Y., Li, X., Wang, P., Deng, S., Woo,  
1013 K.F., Du, Z., Li, C., *et al.* Natural transmission of bat-like SARS-CoV-2DPRRA variants  
1014 in COVID-19 patients. LID - ciaa953 [pii] LID - 10.1093/cid/ciaa953 [doi].
- 1015 Wrensch, F., Winkler, M., and Pohlmann, S. (2014). IFITM proteins inhibit entry driven  
1016 by the MERS-coronavirus spike protein: evidence for cholesterol-independent  
1017 mechanisms. *Viruses* 6, 3683-3698.
- 1018 Xia, S., Lan, Q., Su, S., Wang, X., Xu, W., Liu, Z., Zhu, Y., Wang, Q., Lu, L., and Jiang,  
1019 S. (2020). The role of furin cleavage site in SARS-CoV-2 spike protein-mediated  
1020 membrane fusion in the presence or absence of trypsin. *Signal transduction and targeted*  
1021 *therapy* 5, 92.
- 1022 Zang, R., Gomez Castro, M.F., McCune, B.T., Zeng, Q., Rothlauf, P.W., Sonnek, N.M.,  
1023 Liu, Z., Brulois, K.F., Wang, X., Greenberg, H.B., *et al.* (2020). TMPRSS2 and  
1024 TMPRSS4 promote SARS-CoV-2 infection of human small intestinal enterocytes.  
1025 *Science immunology* 5.
- 1026 Zhang, R., Kim, A.S., Fox, J.M., Nair, S., Basore, K., Klimstra, W.B., Rimkunas, R.,  
1027 Fong, R.H., Lin, H., Poddar, S., *et al.* (2018). Mxra8 is a receptor for multiple  
1028 arthritogenic alphaviruses. *Nature* 557, 570-574.
- 1029 Zhang, R., Miner, J.J., Gorman, M.J., Rausch, K., Ramage, H., White, J.P., Zuiani, A.,  
1030 Zhang, P., Fernandez, E., Zhang, Q., *et al.* (2016). A CRISPR screen defines a signal  
1031 peptide processing pathway required by flaviviruses. *Nature* 535, 164-168.
- 1032 Zhou, P., Yang, X.L., Wang, X.G., Hu, B., Zhang, L., Zhang, W., Si, H.R., Zhu, Y., Li,  
1033 B., Huang, C.L., *et al.* (2020). A pneumonia outbreak associated with a new coronavirus  
1034 of probable bat origin. *Nature*.
- 1035 Zhou, Y., Vedantham, P., Lu, K., Agudelo, J., Carrion, R., Jr., Nunneley, J.W., Barnard,  
1036 D., Pohlmann, S., McKerrow, J.H., Renslo, A.R., *et al.* (2015). Protease inhibitors  
1037 targeting coronavirus and filovirus entry. *Antiviral research* 116, 76-84.
- 1038

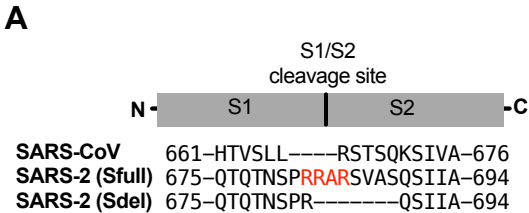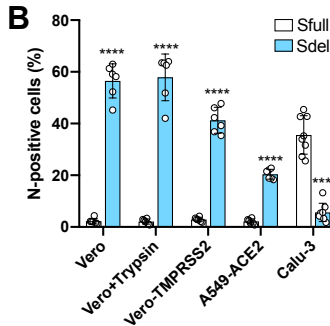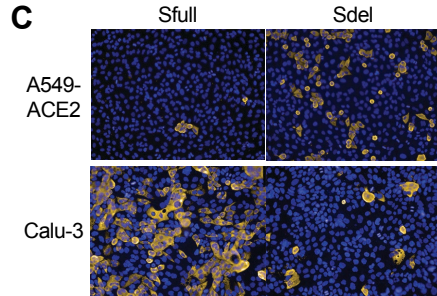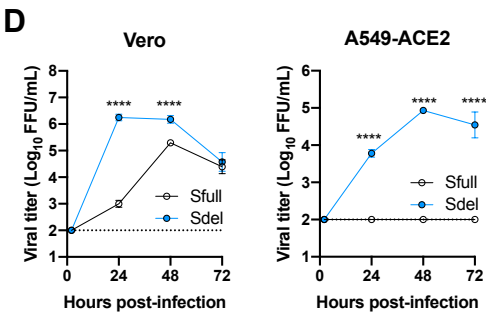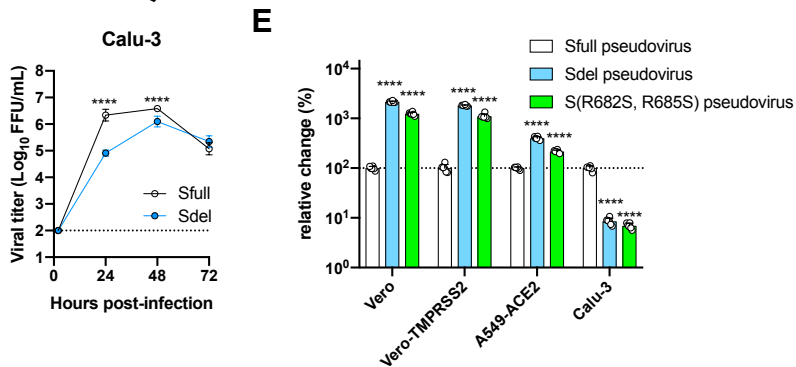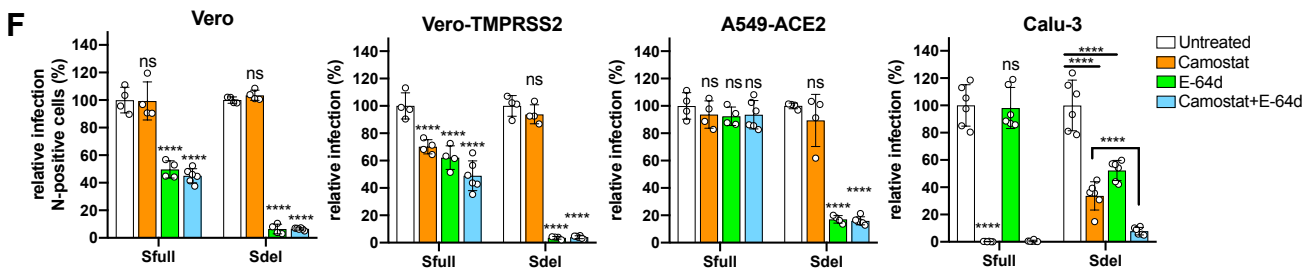

**Figure 1**

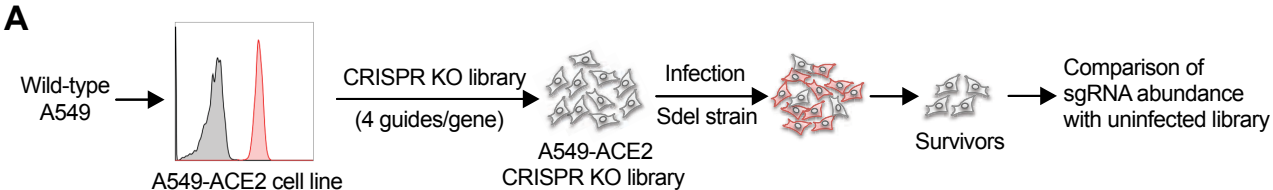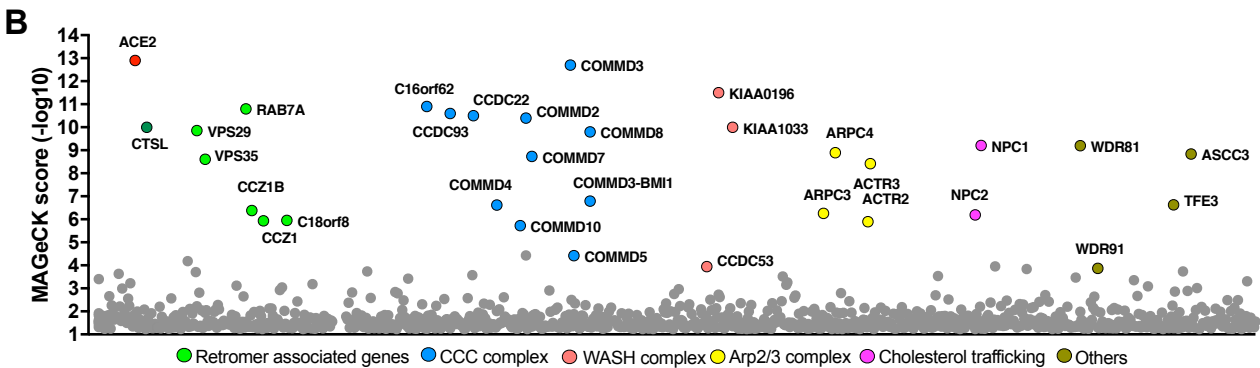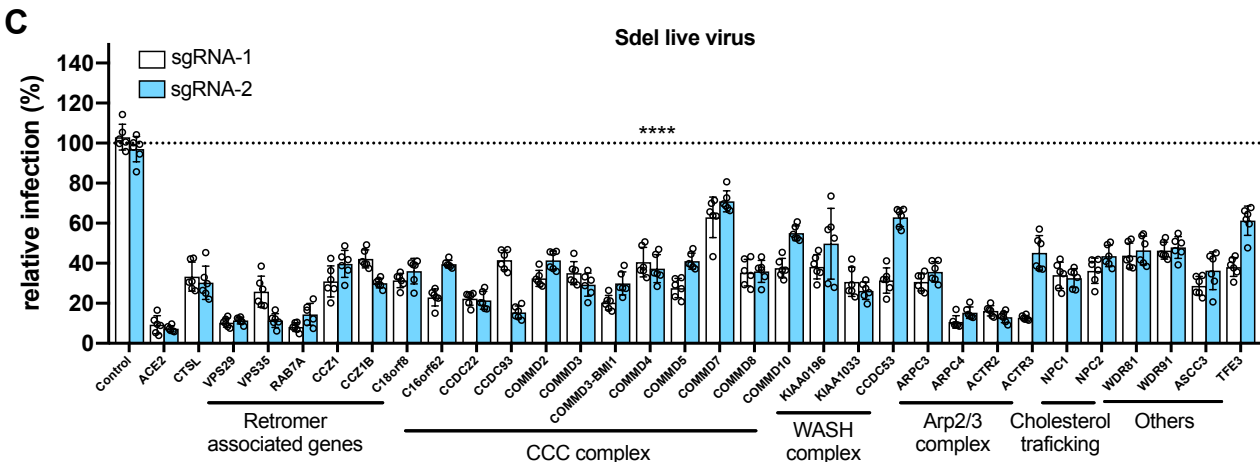

**Figure 2**

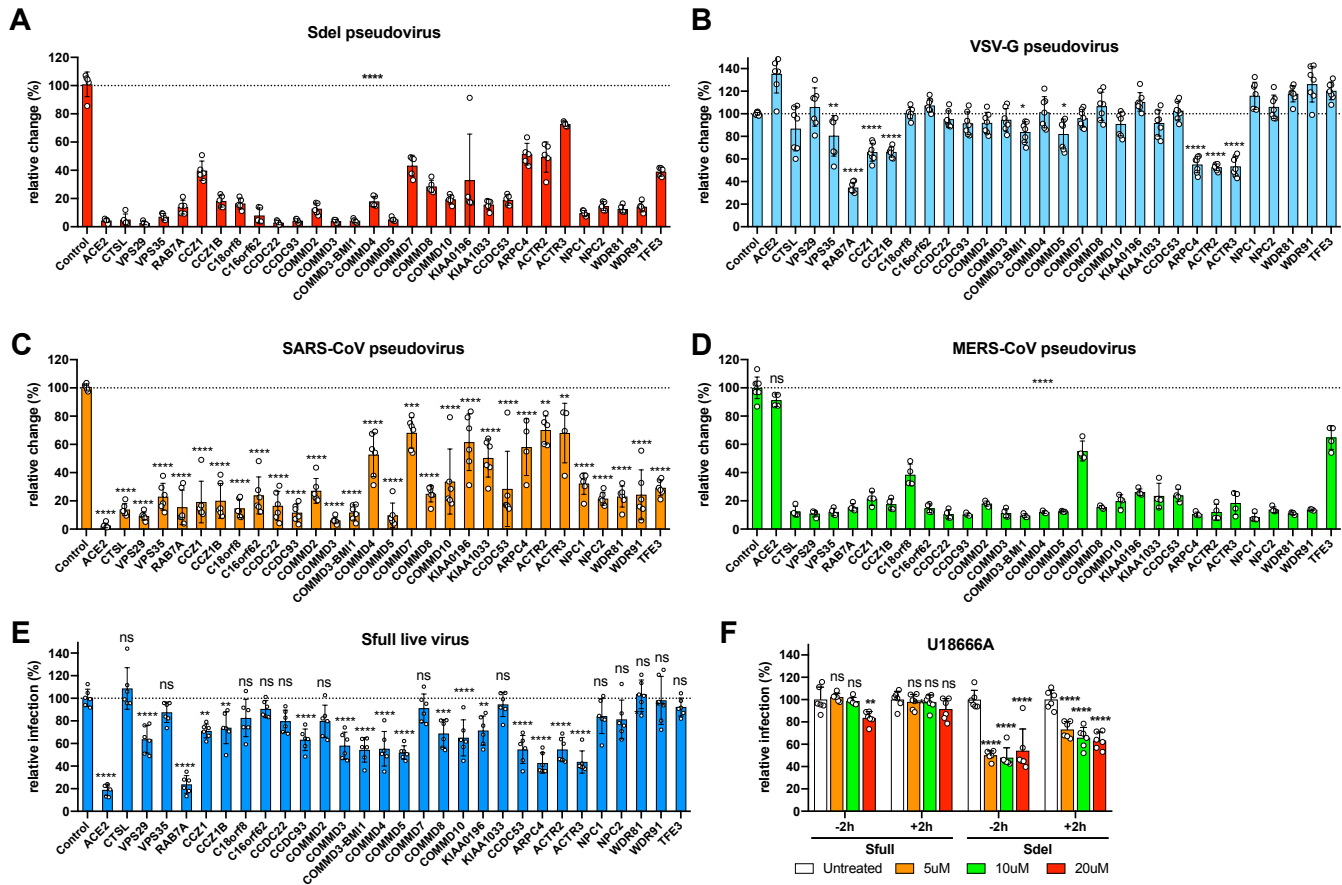

**Figure 3**



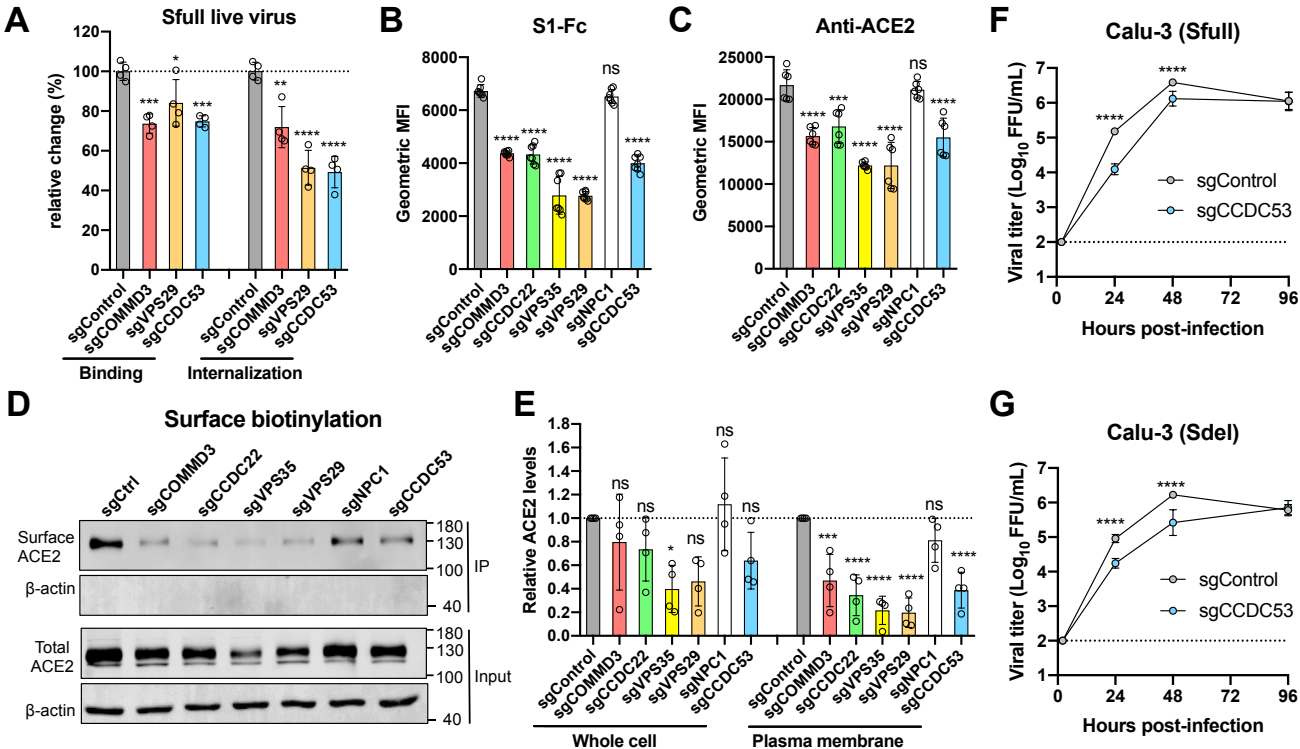

**Figure 4**

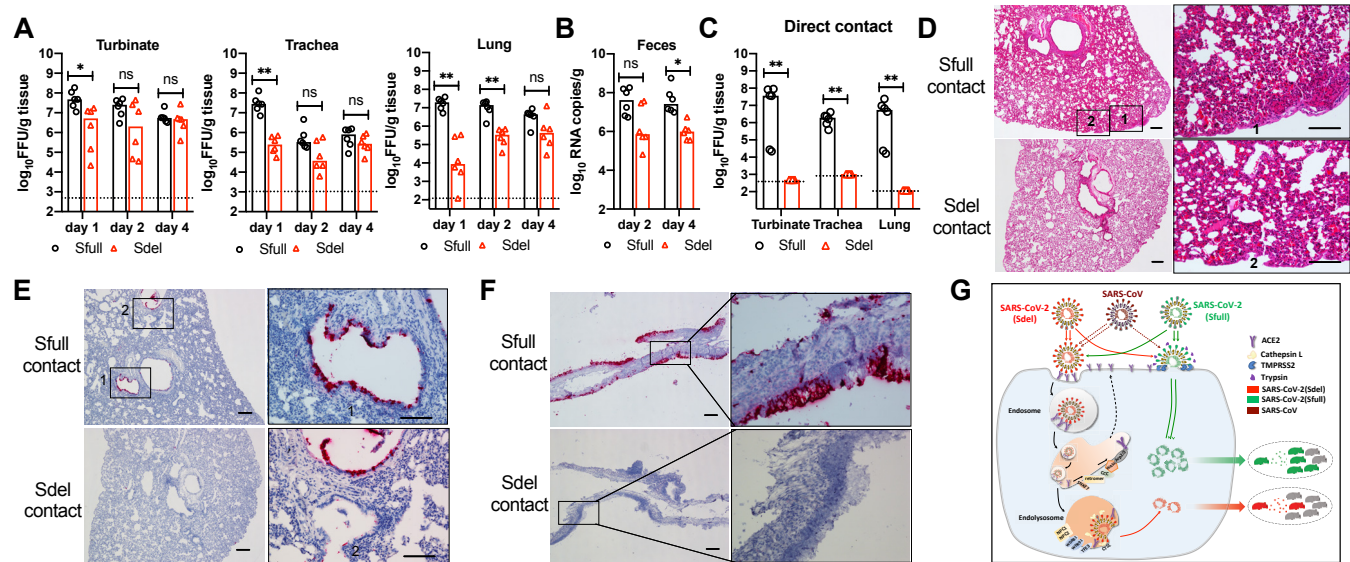

**A****SH01** (three rounds of plaque purification in the presence of trypsin)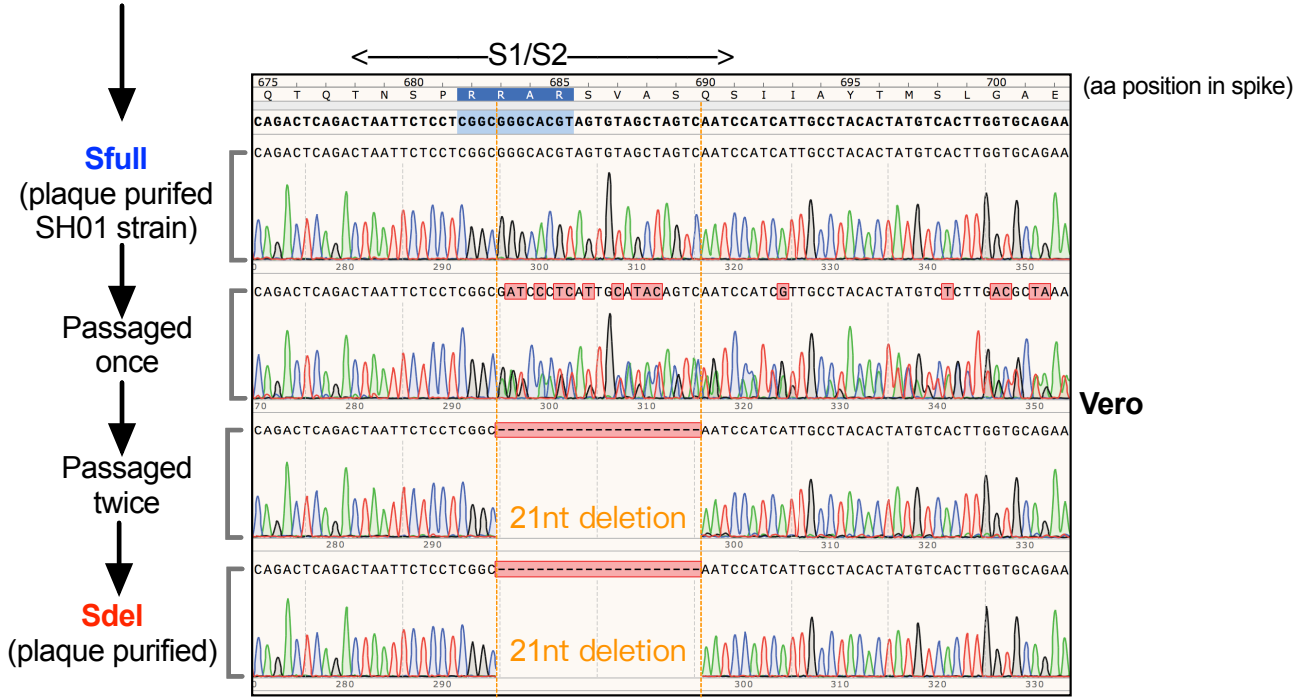**B**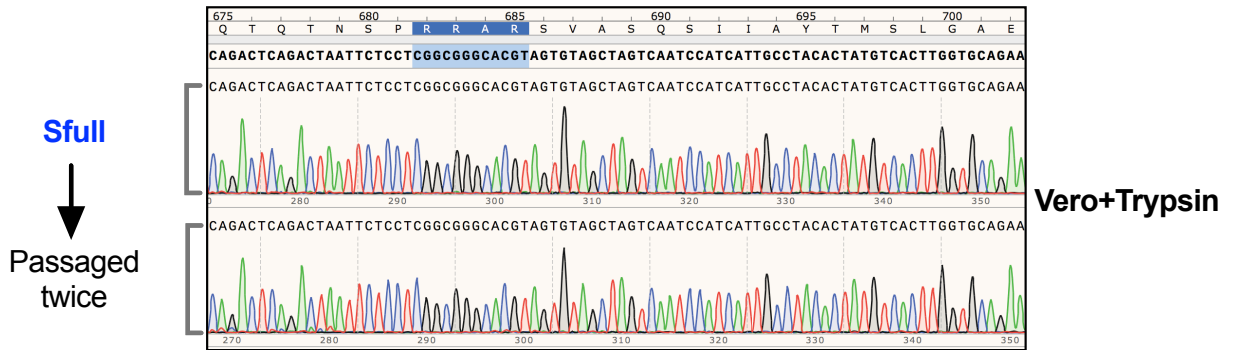**C**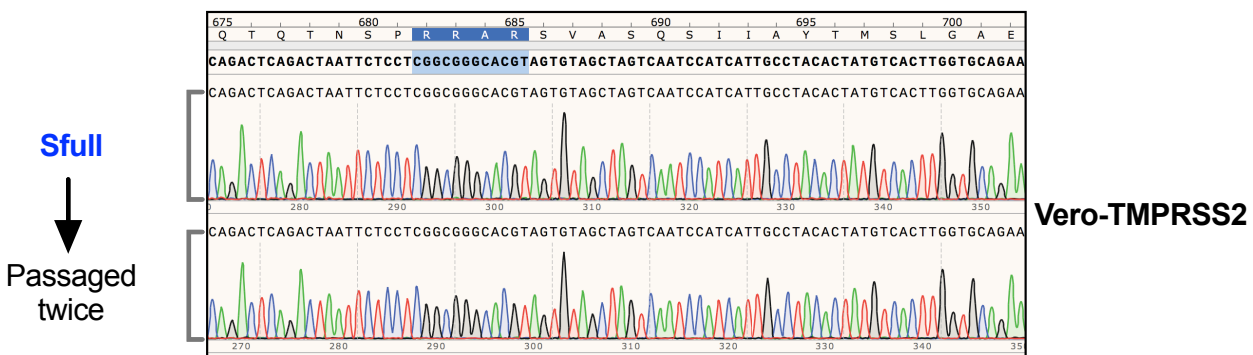**D**

|                   | nsp3<br>(nt 346) | nsp3<br>(nt 3307) | nsp8<br>(nt 382) | nsp14<br>(nt 1079) | Spike<br>(nt 2048-2068)    |
|-------------------|------------------|-------------------|------------------|--------------------|----------------------------|
| <b>Wuhan-Hu-1</b> | G (Gly)          | C (Pro)           | C (Leu)          | C (Ala)            | -                          |
| <b>SH01</b>       | G (Gly)          | T (Ser)           | T (Ser)          | C (Ala)            | -                          |
| <b>Sfull</b>      | T (Cys)          | T (Ser)           | T (Ser)          | T (Val)            | -                          |
| <b>Sdel</b>       | T (Cys)          | T (Ser)           | T (Ser)          | T (Val)            | 21nt deletion<br>(RARSVAS) |

**Figure S1**

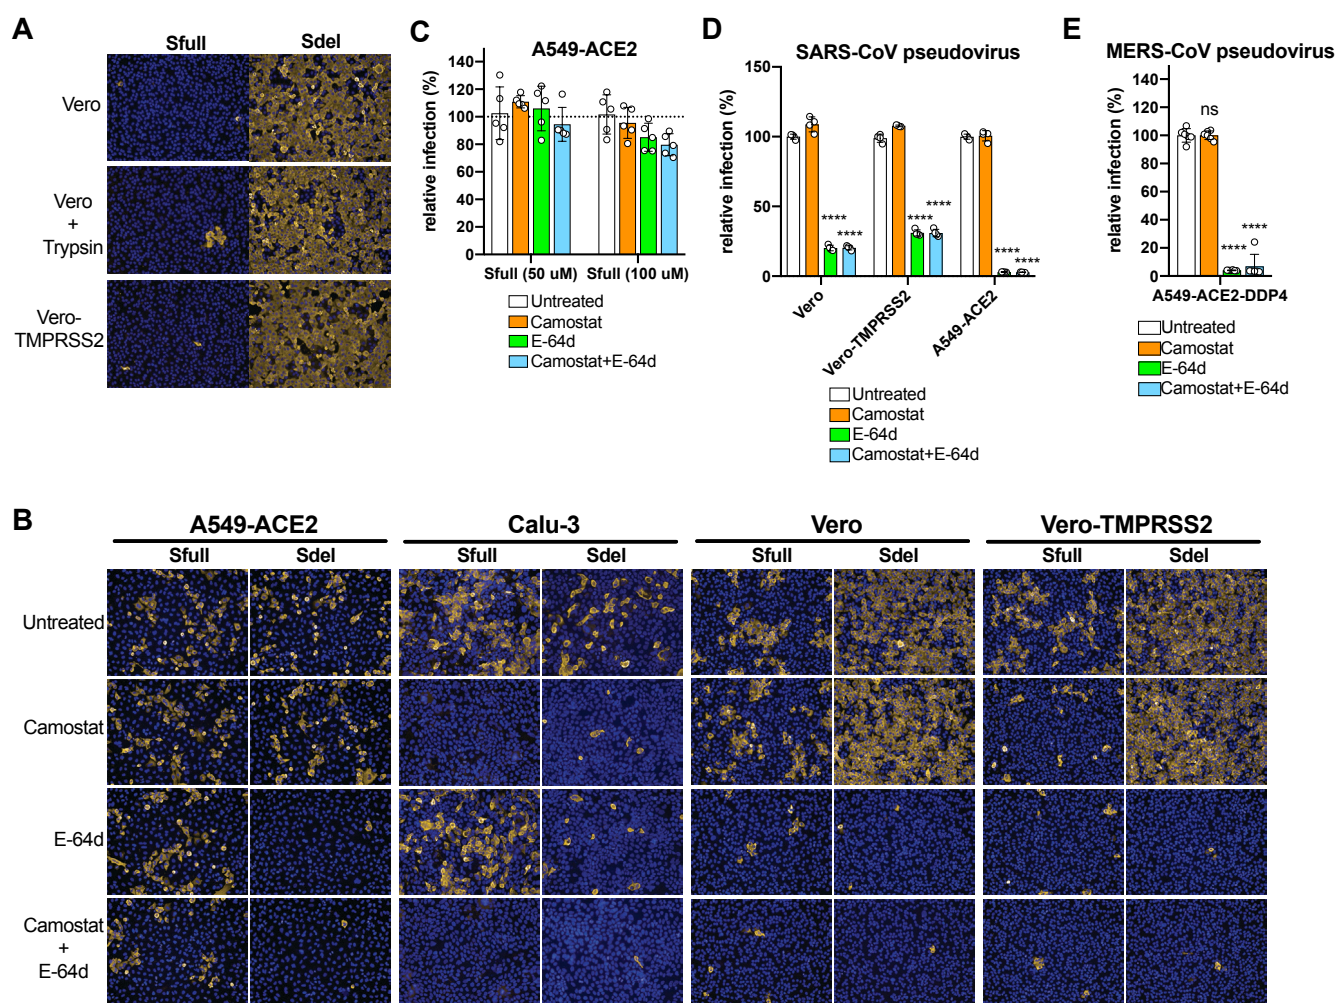

**Figure S2**

**A**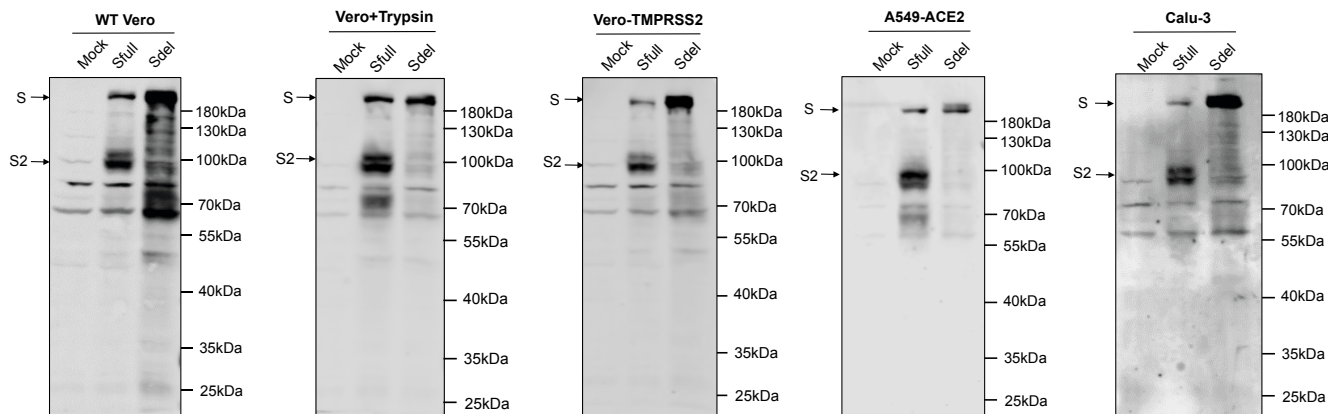**B**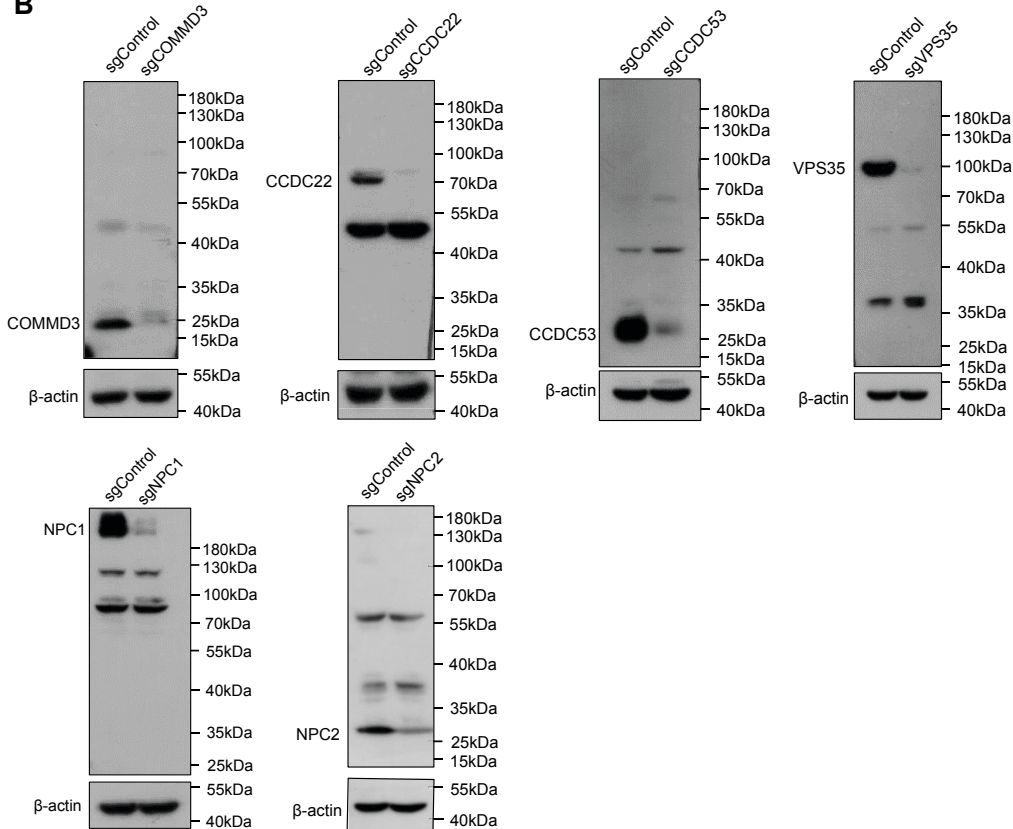**Figure S3**

**A**

Hela-ACE2 cells (Sdel strain)

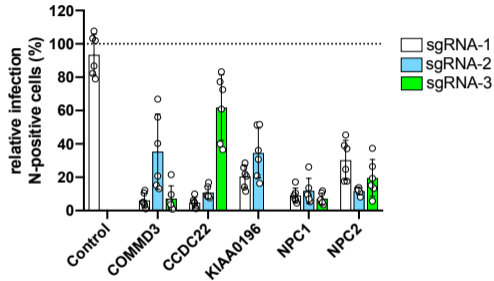**B**

Cell Viability

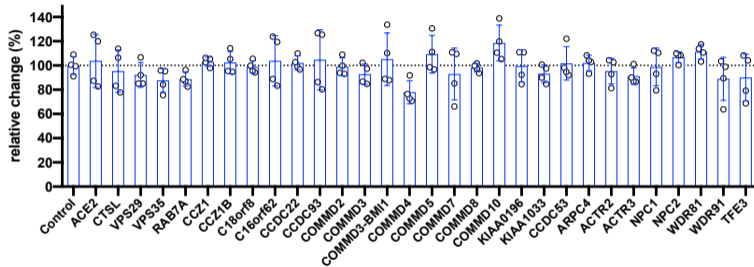**Figure S4**

**A**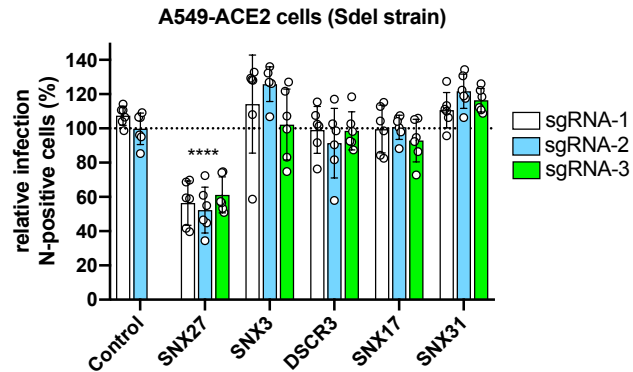**B**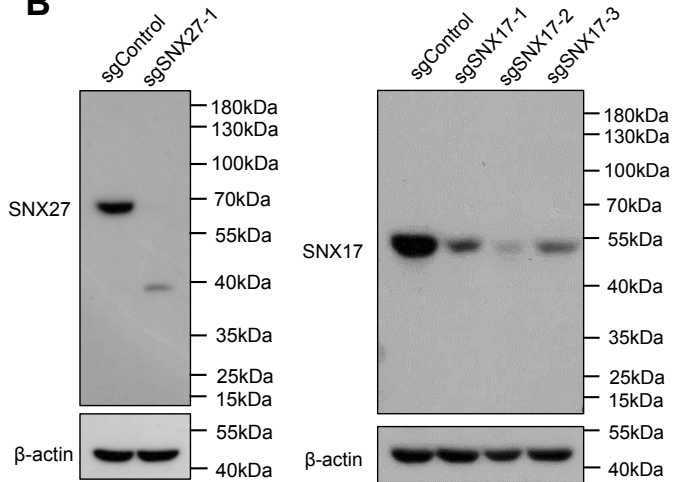**Figure S5**

**A****A549-ACE2 cells (Sdel strain)**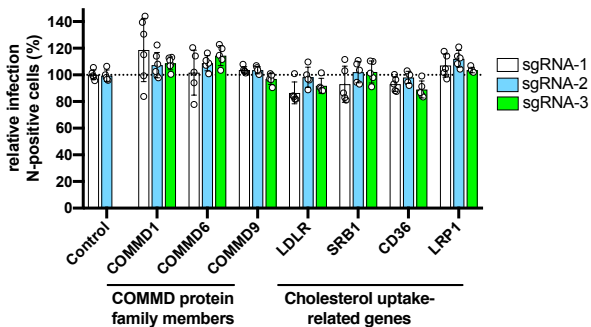**Hela-ACE2 cells (Sdel strain)**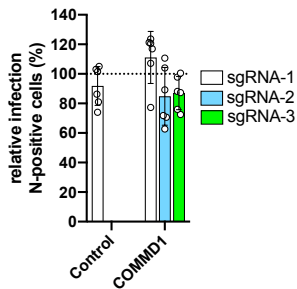**B**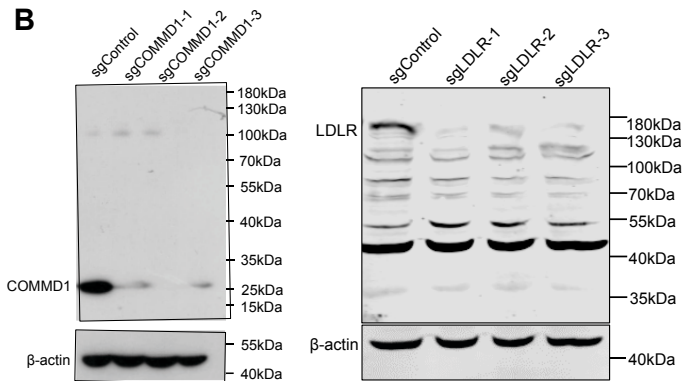**C**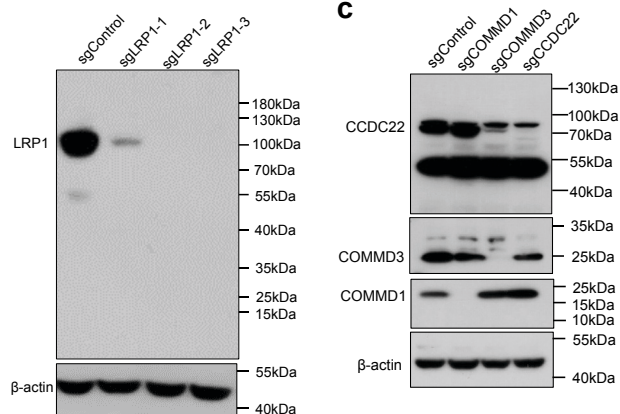**Figure S6**



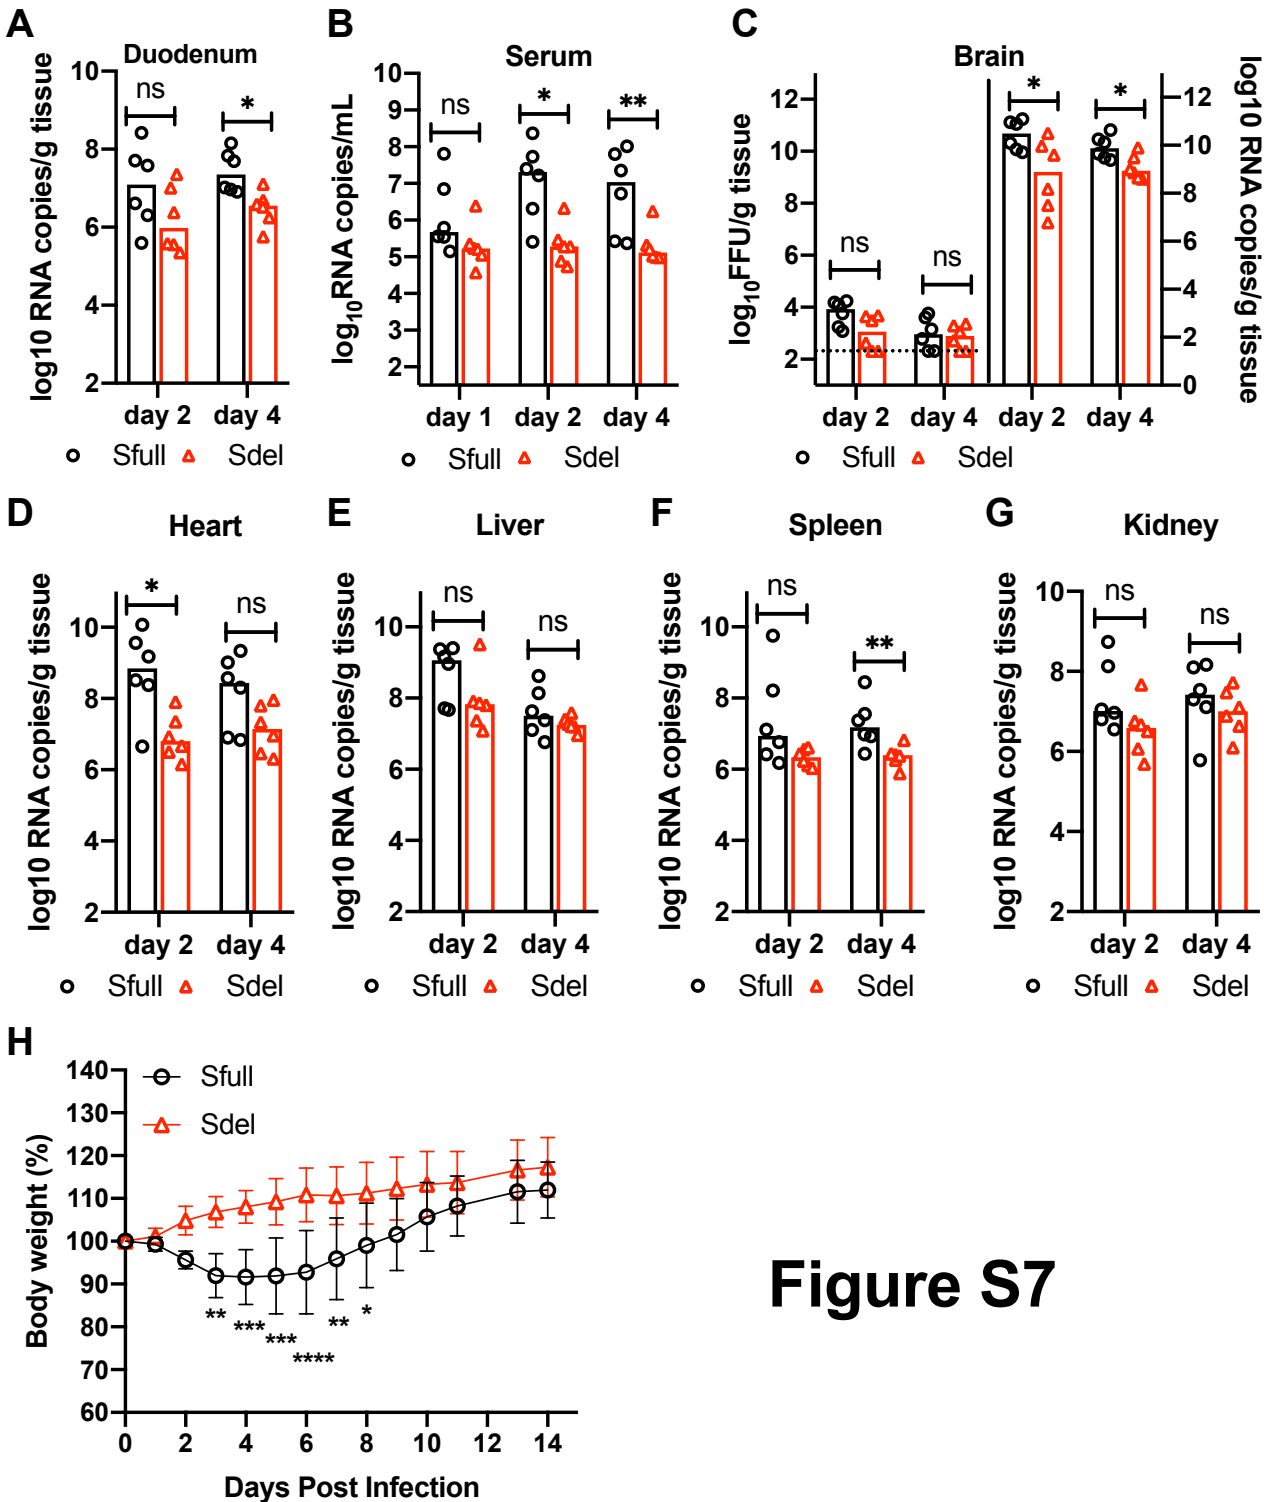

**Figure S7**
